Retsa et al.

1 **A psychophysically-tuned computational model of human primary**  
2 **visual cortex produces geometric optical illusions**

3

4 Chrysa Retsa<sup>1,2</sup>, Ana Hernando Ariza<sup>1</sup>, Nathanael W. Noordanus<sup>1</sup>, Lorenzo Ruffoni<sup>3</sup>, Micah M.  
5 Murray<sup>1,2,4,5</sup> and Benedetta Franceschiello<sup>1,4,\*</sup>

6

7 <sup>1</sup>The Laboratory for Investigative Neurophysiology (The LINE), Department of Radiology, University  
8 Hospital Center and University of Lausanne (CHUV), Lausanne, Switzerland.

9 <sup>2</sup>Sensory, Cognitive and Perceptual Neuroscience Section, Center for Biomedical Imaging (CIBM),  
10 Lausanne, Switzerland

11 <sup>3</sup>Department of Mathematics - Florida State University

12 <sup>4</sup>Department of Ophthalmology, Fondation Asile des Aveugles and University of Lausanne, Lausanne,  
13 Switzerland.

14 <sup>5</sup>Department of Hearing and Speech Sciences, Vanderbilt University Nashville, TN, USA.

15

16 \*Corresponding Author

17

18

Retsa et al.

19 **Abstract**

20 Geometrical optical illusion (GOIs) are mismatches between physical stimuli and perception. GOIs provide  
21 an access point to study the interplay between sensation and perception, yet there is scant quantitative  
22 investigation of the extent to which different GOIs rely on similar or distinct brain mechanisms. We  
23 addressed this knowledge gap. First, 30 healthy adults reported quantitatively their perceptual biases with  
24 three GOIs, whose physical properties parametrically varied on a trial-by-trial basis. Biases observed with  
25 one GOI were unrelated to those observed with another GOI, suggestive of (partially) distinct underlying  
26 mechanisms. Next, we used these psychophysical results to tune a computational model of primary visual  
27 cortex that combines parameters of orientation, selectivity, intra-cortical connectivity, and long-range  
28 interactions. We showed that similar biases could be generated *in-silico*, mirroring those observed in  
29 humans. Such results provide a roadmap whereby computational modelling, informed by human  
30 psychophysics, can reveal likely mechanistic underpinnings of perception.

31

32 **Key words:** Vision, illusion, primary visual cortex, receptive field, computational modeling

33

Retsa et al.

## 34 Introduction

35 The effortlessness of vision belies its mechanistic complexity as well as its perceptual fragility.  
 36 Illusions are key phenomena to study vision. They provide a possibility to distinguish between sensation  
 37 and perception. Illusions also have an ethological significance, as those organisms whose vision is capable  
 38 of surmounting noise and ambiguity in visual scenes (e.g. camouflage) have a clear evolutionary advantage  
 39 (Leshner, 1995). These phenomena also provide a more accurate depiction of the real world, playing a role  
 40 in navigation (Leshner, 1995). Illusory figures present a solution to complex perceptual problems (Leshner,

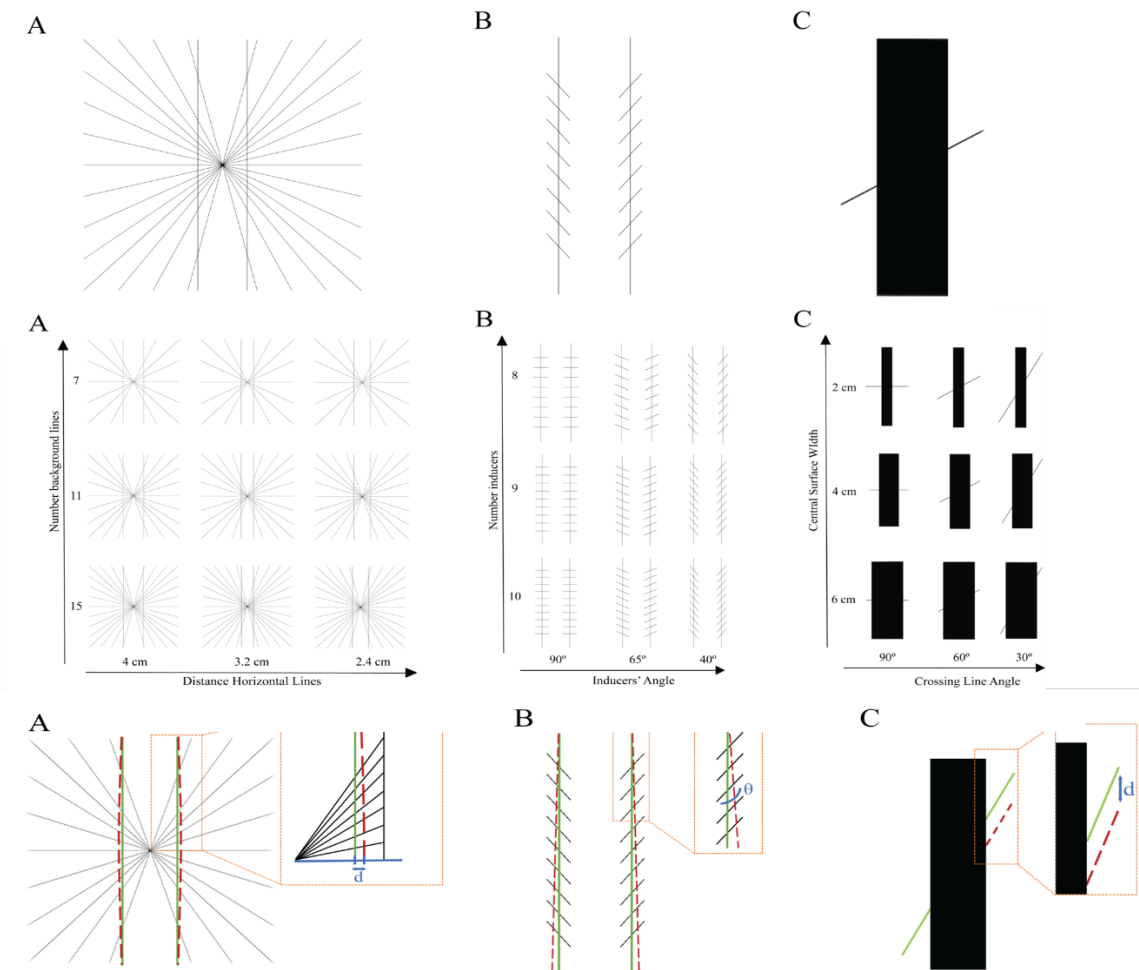

**Figure 1.** (Top Row) Examples of Geometrical-optical illusions. A) Hering illusion: two parallel vertical lines appear as curved due to the presence of a radial background. B) Zöllner illusion: two parallel vertical lines are perceived as non-parallel due to the presence of oblique inducers on the background. C) Poggendorff illusion: a perceived misalignment of the crossing oblique line is induced by the presence of a central surface. (Central Row) Visual stimuli used for the behavioral and the computational experiments. A. Hering illusion. The number of radial lines varies along the y-axis; the distance between the two vertical lines across the x-axis. B. Zöllner illusion. The number of inducer lines varies along the y-axis, the inducers' angle across the x-axis. C. Poggendorff illusion. The width of the rectangle varies along the y-axis, the angle of the line segments across the x-axis. (Bottom Row) Bias calculation. Green line: geometrical real line. Red dotted line: corrected line. A. Hering illusion. The bias corresponds to the distance between the original line and the corrected line. B. Zöllner illusion. The bias refers to the angle ( $\theta$ ) created between the corrected and the parallel lines. C. Poggendorff illusion. The bias is the distance along the right rectangle edge between the corrected right line segment and the physically aligned right line segment.

Retsa et al.

41 1995; Rock & Anson, 1979). In this paper, we focus our attention on a subset of illusory phenomena called  
42 Geometrical-Optical Illusions (GOIs). They were first described in the 19th century by Johann Joseph  
43 Oppel (Oppel, 1855) and subsequently studied by other German psychologists such as Ewald Hering  
44 (Hering, 1861), Rudolph Hermann Lotze (Lotze, 1852) and Karl Zöllner (Zöllner, 1860).

45 GOIs were defined as situations where “there is a mismatch of geometrical properties between the  
46 item in the object space (physical source of the stimulus) and its associated percept” (Westheimer, 2008).  
47 Figure 1 (top row) presents some classical examples of GOIs: the Hering, the Zöllner and Poggendorff  
48 illusions. For example, in the Hering illusion (Figure 1, top row, A), the presence of a radial background  
49 induces a misperception of the two parallel lines, which appear as bowed towards the outside although they  
50 are straight. Optical illusions were first studied from the psychophysical point of view, leading to qualitative  
51 models that first identified the underlying mechanisms in terms of cognitive, retinal, and perceptual  
52 processes. Behavioral tests using these illusions have been performed during the 1960s-1980s (Beckett,  
53 1989; Holt-Hansen, 1961; Oyama, 1975; Weintraub & Krantz, 1971), but there are both methodological  
54 limitations (e.g. hand-drawings were often used) and limited statistical analysis (i.e. most studies were  
55 purely observational and not quantitative). Therefore, the bias, i.e. *the difference between the geometrical  
56 nature of the stimuli and the perceived one* (amount of perceived curvature induced by the distance between  
57 original and corrected line, divergence and misalignment, respectively, for the GOIs depicted in Figure 1,  
58 top row), has not yet been investigated systematically. From the neurophysiological standpoint, several  
59 mechanisms have been proposed to contribute to illusory perceptual phenomena (Eagleman, 2001), such as  
60 lateral interactions between cells responsible for extracting basic features at the intracortical level, or  
61 feedback and feed-forward mechanisms across hierarchical levels of the visual pathway. Lateral inhibition  
62 refers to nearby neurons in the cortex spiking (near) simultaneously, due to competing features of the initial  
63 stimulus: the produced neuronal responses are themselves ambiguous in their coding. In the case of illusory  
64 contours, where geometrical objects such as lines or figures are perceived – although not physically present,  
65 feedback mechanisms have been postulated as – at least partly – responsible. Feedback modulations in the  
66 case of illusory perceptual phenomena allow for the incorporation of integration of information across  
67 longer distances, since higher-level cortices contain neurons with large receptive fields, and therefore the  
68 substantiation of Gestalt-like principles of perceptual grouping (Dura-Bernal, Wennekens, & Denham,  
69 2011; Murray & Herrmann, 2013a). The specific contributions of these mechanisms to perceptual outcomes  
70 remain to be fully characterized.

71 Nonetheless, these psychophysical and neurophysiological observations have opened up the  
72 possibility of also investigating and computationally modeling the neural substrates of such illusory  
73 processing by means of the features (contour perception, brightness, depth) – determinants – of the stimuli  
74 (Leshner, 1995). Neural-based computational models of visual perception aim to provide mathematical

Retsa et al.

75 descriptions of such neurophysiological features. A stable prediction of the misperception in GOIs could  
76 be explained by a model considering three main neurophysiological features (B. Franceschiello, Mashtakov,  
77 Citti, & Sarti, 2019; Benedetta Franceschiello, Sarti, & Citti, 2017): 1) orientation selectivity process  
78 performed by visual areas V1 and V2 (Hubel & Wiesel, 1962), 2) interference between receptive profiles  
79 of simple cells in these areas, and 3) long-range connectivity (Bosking, William H., 1997).

80 In terms of computational modelling, the orientation selectivity process is implemented by applying  
81 convolutional filters capable of extracting the most prominent orientation for each small portion of the  
82 visual field where the stimulus is represented. This interpretation holds in the case of possible interference  
83 between close-by receptive profiles. Many models have been proposed for this convolutional operation,  
84 among those the Derivative of Gaussians (DoG), introduced by Young (Young, 1987) and Daugman  
85 (Koenderink & van Doorn, 1990), Gabor filters, introduced by Daugman (Daugman, 1985) and Jones and  
86 Palmer (Jones & Palmer, 1987), and cake wavelets (Duits, Felsberg, Granlund, & Romeny, 2007). Gabor  
87 filters are particularly interesting as they have been proven to mimic accurately receptive profiles of simple  
88 cells in V1, as recorded neurophysiologically by De Angelis (De Angelis, Ohzawa, & Freeman, 1995). As  
89 for the long-range connectivity (or horizontal connectivity) of the primary visual areas, we refer to the  
90 mechanism “connecting” neurons spiking simultaneously while situated at relatively far distances (ca. 300-  
91 400 $\mu\text{m}$ ) from one another. Long-range connections enable the formation of contours, surfaces, and more  
92 complex objects and they have been mathematically described in terms of mean field equations (Bertalmio  
93 et al., 2020; Bertalmio & Cowan, 2009; Bressloff, Cowan, Golubitsky, Thomas, & Wiener, 2001; Schuster  
94 & Wagner, 1990), of statistics of the visual inputs (Bednar, 2014; Simoncelli & Olshausen, 2001) or by a  
95 geometrical description of the visual areas (Ben-Shahar & Zucker, 2004; Citti & Sarti, 2006; Hoffman,  
96 1980; Petitot, 2002). Among those computational models providing a description for GOIs, we find a  
97 statistical-based approach in (Fermüller & Malm, 2004) and a geometrical approach in (Ehm &  
98 Wackermann, 2012, 2016). The first models interpreting GOIs while having a neural-based approach are  
99 those in (Franceschiello, Benedetta, Sarti, Alessandro, Citti, 2017; Franceschiello et al., 2019). These  
100 provided a first *qualitative* reconstruction of the phenomena. By integrating psychophysical data from  
101 actual observers, we were therefore in a position to determine the contributions of the neural components  
102 of the *in-silico* simulations, providing for the first time a *quantitative* reconstruction of the phenomena.

103 The contributions of the present paper are threefold. Firstly, and to our knowledge for the first time,  
104 we introduce a standardized, quantitative measure of perceptual bias for each of the three GOIs: Hering,  
105 Zollner and Poggendorff illusions. Furthermore, these perceptual illusions are analyzed together for the first  
106 time, enabling us to determine to what extent biases are related and by extension the degree to which distinct  
107 mechanisms contribute to each illusion. Second, we establish the practice of tuning the computational  
108 models in (B. Franceschiello et al., 2019; Benedetta Franceschiello et al., 2017) using psychophysical data:

Retsa et al.

109 computational models are strongly dependent on the choice of parameters. A part of them is only  
110 computationally driven, while another part represents neurophysiological correlates of the studied  
111 processes. Tuning the computational model means iteratively optimizing the parameters to achieve a  
112 replication of human behavior. The third contribution of this work is to derive neural-based conclusions  
113 from those neurophysiological-related parameters which permitted the computational model fitting, i.e. a  
114 quantitative reproduction of the phenomena. This allows us to finally reveal those mechanisms responsible  
115 for the perception of geometrical optical illusions.

116

117

## 118 **Materials and Methods**

### 119 **Behavioral Experiment**

120 *Participants.* Thirty healthy unpaid volunteers (19 females; aged 22–39 years; mean±SD=28.4±4.3 years)  
121 provided informed consent to participate in the experiment. All procedures conformed to the 2013 update  
122 of the Declaration of Helsinki and were approved by the Cantonal Ethics Committee. None of the subjects  
123 had current or prior neurological or psychiatric illnesses. All participants had normal or corrected-to-normal  
124 vision.

125

126 *Stimuli.* The experiment included stimuli for the three different illusion tasks: Hering, Zöllner and  
127 Poggendorff. Visual stimuli were independently varied along 2 aspects of interest (i.e. our independent  
128 variables for each condition). For each illusion, nine sets of visual stimuli were presented as in different  
129 conditions, following a 3×3 factorial design.

130 *Hering stimuli.* The neutral configuration of Hering stimuli consists of two parallel vertical lines  
131 (foreground curves) and a symmetrical arrangement of radial background lines, which meet in the center  
132 of the image, halfway between the two foreground lines. The participants then usually report the two  
133 straight, parallel vertical lines as appearing curved (Hering, 1861). In the present experimental set-up,  
134 participants had to adjust the vertical lines in order to appear subjectively straight and parallel.

135 In our experiment, each stimulus is drawn in a rectangular region in the center of the screen with a gap  
136 above and below of 5% of the height of the screen (the height of the screen used was 20 cm), such that the  
137 vertical extent of the stimulus is the middle 90% of the height of the screen. The background of the stimulus  
138 consists of a number of lines disposed radially, see Figure 1, central row, (A). These lines are evenly spaced  
139 along the edges of the central square, as a rule always including the horizontal and diagonal lines and  
140 excluding the central vertical line (see Figure 1, central row, (A)). All stimuli consisted of black lines  
141 presented on a white background.

Retsa et al.

142 The nine different stimuli in the Hering condition were obtained by varying independently the number of  
143 radial lines and the distance between the two main vertical lines (Figure 1, central row, (A)). These two  
144 variables were chosen because they constitute the main components of the Hering illusion. Each stimulus  
145 included either 7, 11 or 15 radial lines (the corresponding values in the Psychopy code for stimuli  
146 presentation are 5, 7 and 9) and a distance between the two vertical lines of either 2.4 cm, 3.2 cm and 4 cm,  
147 (the corresponding values in the code are: 0.06, 0.08, 0.1). The values were fixed in order to have  
148 perceivable differences while experiencing the illusory effects. To recover the measure in cm, these values  
149 (0.12, 0.16 and 0.2) were multiplied by the height of the screen (20 cm).

150 The two foreground curves are not always drawn straight, but the curves appear smooth in all  
151 configurations. The foreground curves can veer towards or away from the center of the image. We define  
152 the offset to be the initial horizontal distance (varied for each trial) between one of the straight vertical line  
153 in the neutral configuration and the corresponding foreground curve (see Appendix A for further  
154 explanations). We varied the initial value of the offset by discrete steps (up to 4 steps in either direction).  
155 When the participant adjusts the offset parameter by pressing the up or down key, the value of the offset is  
156 adjusted by 1 step. We varied the initial value of the offset in order not to bias the participant towards a  
157 stable initial configuration. However, this parameter is not among our main experimental manipulations.  
158 The measure of this experiment is the final offset, which corresponds to the distance from the neutral  
159 configuration and represents what the participant perceives as straight/parallel, and it is measured in discrete  
160 steps. This is the perceived bias (Figure 1, bottom row, A).

161  
162 *Zöllner stimuli.* The neutral configuration of Zöllner stimuli consists of two vertical lines each intersected  
163 by a number of segments (inducers), see Figure 1, central row, (B). Despite the fact that the vertical lines  
164 are parallel to each other, the participants perceive them as not parallel and instead report them to appear to  
165 converge and diverge from each other. In the present experimental set-up, participants had to adjust the  
166 angle of the vertical lines in order to appear subjectively parallel.

167 In our experimental setup, the inducers are parallel segments spread evenly over the length of the vertical  
168 lines. The inducers intersecting the left vertical line are consistently oriented from top left to bottom right  
169 and the inducers on the right line form their mirrored image. The length of the vertical lines is 80% of the  
170 height of the screen (16cm). The distance between them is 4 cm (0.2 of the screen height). The length of  
171 the inducers is 2cm (0.1 of the screen height).

172 The nine different stimuli in Zöllner were obtained by varying independently the two following parameters:  
173 the number of inducers and the angle of the inducers, Figure 1, central row, (B). In our example, only the  
174 angle is manipulated and the number of inducers, which could vary between 8, 9 and 10 inducers, is used  
175 as control. The angle can vary between 40°, 65° and 90° (from vertical). These latter values were fixed in

Retsa et al.

176 order to have perceptual differences while experiencing the illusory effects. The participants manipulated  
177 the angle of the vertical lines (both lines were rotated together in a mirrored way). The offset step size is  
178 0.1 degrees. The vertical lines in the Zöllner illusion were not always drawn parallel; sometimes they were  
179 tilted by a small angle, which is considered as the distance from the neutral configuration ; it is what we  
180 refer to as offset and it varies in discrete steps. We varied the initial offset between  $-0.6^\circ$  to  $0.6^\circ$ . When the  
181 participant adjusts the offset parameter by pressing the up or down key, the value of the offset is adjusted  
182 by 1 step. The measure of this experiment is called final offset, which corresponds to the distance from the  
183 neutral configuration and represents what the participant perceives as parallel. This is their perceived bias  
184 (Figure 1, bottom row, (B)).

185  
186 *Poggendorff stimuli.* The neutral configuration of Poggendorff stimuli consists of two collinear segments  
187 separated by a central surface. The participants usually report the two collinear segments as misaligned. In  
188 the present experiment, participants had to adjust the vertical position of the right segment in order for the  
189 two segments to be subjectively perceived as collinear.

190 In our experimental setup, the stimuli consist of a central black rectangle, with a fixed height of 16 cm and  
191 a width that varies from one presentation to another, and two black lines, one on the left side and one on  
192 the right. The nine different stimuli in Poggendorff were obtained by varying independently the width of  
193 the rectangle and the angle (slope) of the line segments, Figure 1, central row, (C). These two independent  
194 variables were chosen as they constitute the main components of the Poggendorff illusion. The width of the  
195 rectangle was varied between 2, 4 and 6 cm, and the angle of the line segments between  $30^\circ$ ,  $60^\circ$  and  $90^\circ$   
196 (from the vertical configuration). These values were chosen in order to have a significant difference in the  
197 perception of the illusory effects. The two segments always have the same slope. Both line segments extend  
198 to 4 cm horizontally away from the center of the screen. Therefore, their length depends on the width of the  
199 rectangle and on the slope. In the neutral position (zero offset), the right and left segments both align with  
200 the central point of the rectangle, as if to form a single line passing through that point. The left line is always  
201 fixed in this position. However, as in the other illusion tasks, there is an initial offset variable. Specifically,  
202 the right line can be offset by a variable amount ranging between  $-0.04$  to  $0.04$  cm. When the participant  
203 adjusts the offset parameter by pressing the up or down key and moving the right line segment upwards or  
204 downwards, the value of the offset is adjusted by 1 step of 0.02 cm size. The measure of this experiment is  
205 the final offset, which is the vertical distance from the neutral configuration (alignment of the segments)  
206 and represents what the participant perceives as collinear. This is the perceived bias (Figure 1, bottom row,  
207 (C)).

208  
209 *Procedure and Experimental design.* Participants sat in a darkened, sound-attenuated room (WhisperRoom



Retsa et al.

210 MDI, 102126E) in front of a laptop screen (MacBook Pro end 2013, 13-inch, resolution: 2560 x 1600) that  
211 was presenting the different stimuli. The distance between participants' eyes and the screen was kept  
212 constant at approximately 75 cm, for a vertical visual angle of 15°, which implies that the stimuli were  
213 projected in participants' central vision. The experiment consisted of three different blocks, one for each  
214 illusion task. Participants performed each illusion task one after the other; the order of which was  
215 counterbalanced across participants. Participants took short breaks between the different tasks. Within each  
216 block, the nine different sets of stimuli were presented randomly to the participants. Each stimulus remained  
217 on the screen for as long as the participant took to respond. Participants then pressed the spacebar in order  
218 to proceed to the next trial. The order of trials was randomized for each participant. Short instructions were  
219 presented at the beginning of each of the tasks, followed by a couple of practice trials for the participant to  
220 get familiarized with the tasks. Stimulus delivery and behavioral response collection were programmed and  
221 controlled by PsychoPy v3.0 (Peirce et al., 2019). The code for the experiments is publicly available at the  
222 following link: <https://gist.github.com/nat-n/879d06244a694d47c4911098aac60656>.

223  
224 Depending on the illusion, participants were instructed to adjust the target lines (green lines in Figure 1,  
225 bottom row) in order to i) either make them appear subjectively parallel (Hering and Zöllner) or ii) to appear  
226 collinear (Poggendorff).

227 To move the target lines, their task was to press either the up or down arrow keys on the keyboard. In the  
228 Hering illusion, the target lines were the two foreground curves (Figure 1, bottom row, (A)). These curves  
229 were bent outwards if the down button was pressed and inwards if the up key was pressed, according to the  
230 mathematical expression of the curve (see Appendix, section A). For the Zöllner illusion, the target lines  
231 were again the two vertical lines. The vertical lines shifted outwards if the up key was pressed and inwards  
232 if the down key was pressed (Figure 1, bottom row, (B)). In the Poggendorff illusion, the target line was  
233 the right line segment (Figure 1, bottom row, (C)). The right segment moved up if the up key was pressed  
234 and down if the down key was pressed.

235  
236 *Hering design.* A 3 (number of radial lines: 7, 11 and 15) by 3 (distance between vertical lines: 2.4 cm, 3.2  
237 cm and 4 cm) factorial design was adopted, resulting in 9 experimental conditions. Each of the nine  
238 conditions was presented 12 times, resulting in 108 trials in total. It should be noted that the initial value of  
239 the offset was not specified as an experimental factor. For each condition, we set several initial offset values:  
240 – 0.107 cm (1 time), -0.053 cm (3 times), 0 cm (4 times), 0.053 cm (3 times) and 0.107 cm (1 time),  
241 following a Gaussian distribution with mean equal to the condition we wanted to test most often. The bias  
242 here was defined as the horizontal distance between the original vertical line and the manipulated final  
243 curve, see Figure 1, bottom row, (A). An explanation that links the described “distance” and the curvature

Retsa et al.

244 of the final curve is presented in the Appendix, (A). To calculate the distance, we summed the number of  
245 times the up and down arrow keys were pressed, giving it a positive value when the down key was pressed  
246 and a negative value when the up key was pressed. The resulting final offset, encoding the final position of  
247 the line according to the participant's perception, was then multiplied by the offset step size, equal to 0.0267  
248 cm in the Hering illusion (see the Stimuli section).

249

250 *Zöllner design.* A 3 (number of inducers: 8, 9 and 10) by 3 (angle of inducers: 40°, 65° and 90°) factorial  
251 design was adopted, resulting in 9 experimental conditions. Each of the nine conditions was presented 12  
252 times, resulting in 108 trials in total. The initial value of the offset was not specified as an experimental  
253 factor. For each condition, we set several initial offset values:  $-0.6^\circ$  (1 time),  $-0.4^\circ$  (3 times),  $0^\circ$  (4 times),  
254  $0.4^\circ$  (3 times) and  $0.6^\circ$  (1 time), following a Gaussian distribution with mean equal to the condition we  
255 wanted to test most often. The bias referred to the angle created between the corrected and the parallel lines  
256 Figure 1, bottom row, (B). To calculate that angle, we summed the number of times the up and down arrow  
257 keys were pressed, giving it a positive value when the up key was pressed and a negative value when the  
258 down key was pressed. The resulting value (final offset) was then multiplied by the angle in degrees  
259 corresponding to how much the line moved each time we pressed an arrow, i.e. its offset step size equal to  
260  $0.1^\circ$ .

261

262 *Poggendorff design.* A 3 (width of the rectangle: 2, 4 and 6cm) by 3 (angle of the line segments: 30°, 60°  
263 and 90°) factorial design was adopted, resulting in 9 experimental conditions. Each of the nine conditions  
264 was presented 12 times, resulting in 108 trials in total. The initial value of the offset was not specified as  
265 an experimental factor. For each condition, we set several initial offset values:  $-0.04$  cm (1 time),  $-0.02$   
266 cm (3 times),  $0$  cm (4 times),  $0.02$  cm (3 times) and  $0.04$  (1 time), following a Gaussian distribution with  
267 mean equal to the condition we wanted to test most often. The bias for Poggendorff was calculated as the  
268 distance, computed along the right side of the rectangle, between the right line segment and the actual  
269 physically aligned segment, Figure 1, bottom row, (C). To calculate that distance, we summed the number  
270 of times the up and down arrow keys were pressed, giving it a positive value when the up key was pressed  
271 and a negative value when the down key was pressed. The resulting value (final offset) was then multiplied  
272 by the distance in cm that the line moved each time we pressed an arrow (offset step size equal to 0.02 cm)

273

274

275 *Behavioral analysis.* IBM SPSS Statistics 25 (IBM Corp. Released 2017. IBM SPSS Statistics for  
276 Windows, Version 25.0. Armonk, NY: IBM Corp.) was used for data analysis. First, we tested whether the  
277 recorded data were normally distributed using a Shapiro-Wilk test. All data were normally distributed.

Retsa et al.

278 Hence, a  $3 \times 3$  repeated measures ANOVA was used for each illusion task in order to analyze the effects  
279 of our experimental manipulations on the participants' calculated biases. The factors that were used were:  
280 the number of radial lines (7, 11, 15) and the distance between the vertical lines (2.4 cm, 3.2 cm, 4 cm) for  
281 Hering, the number of inducers (8, 9, 10) and angle of inducers ( $40^\circ$ ,  $65^\circ$ ,  $90^\circ$ ) for Zöllner and the width  
282 of the rectangle (2 cm, 4 cm, 6 cm) and the angle of the line segments ( $30^\circ$ ,  $60^\circ$ ,  $90^\circ$ ) for Poggendorff.

283

## 284 **Computational experiment**

285

286 *Theoretical formulation of the model.* The cortically inspired computational models introduced in (B.  
287 Franceschiello et al., 2019; Benedetta Franceschiello et al., 2017) have proven to be effective in reproducing  
288 the qualitative responses of the primary visual cortices in response to geometrical optical illusions. The  
289 model, tested in (B. Franceschiello et al., 2019; Benedetta Franceschiello et al., 2017) from a purely image  
290 processing perspective, takes into account as a first step the orientation selection mechanisms discovered  
291 by Hubel and Wiesel (Hubel & Wiesel, 1962) and modelled computationally by Daugman (Daugman, 1985)  
292 and Jones and Palmer (Jones & Palmer, 1987). For a full description of the model, we refer readers to (B.  
293 Franceschiello et al., 2019; Benedetta Franceschiello et al., 2017). Here, we briefly summarize the  
294 approach. Gabor filters have the following formulation in their expression independent from time:

$$\psi(x, y, \theta) = \frac{\gamma}{2\pi\sigma^2} e^{-\frac{(\mu_1^2 + \gamma\mu_2^2)}{2\sigma^2}} e^{\frac{2i\bar{b}\mu_2}{\sigma}} \quad (1)$$

295

$$\mu_1 = x \cos(\theta) + y \sin(\theta)$$

296

$$\mu_2 = -x \sin(\theta) + y \cos(\theta),$$

297 where  $(x, y) \in \mathbb{R}^2$  represents the global coordinates on the initial image;  $\bar{b}$ ,  $\sigma$  and  $\gamma$  are extra parameters  
298 determining the shape and size of the filter.  $\psi(x, y, \theta)$  is a complex-valued function, therefore we can  
299 identify a real part and imaginary part. The real part is an even function with respect to  $(x, y)$ :

$$\text{Re}(\psi(x, y, \theta)) = \frac{\gamma}{2\pi\sigma^2} e^{-\frac{(\mu_1^2 + \gamma\mu_2^2)}{2\sigma^2}} \cos\left(\frac{2i\bar{b}\mu_2}{\sigma}\right) \quad (2)$$

300 While the imaginary one an odd function with respect to  $(x, y)$ :

$$\text{Im}(\psi(x, y, \theta)) = \frac{\gamma}{2\pi\sigma^2} e^{-\frac{(\mu_1^2 + \gamma\mu_2^2)}{2\sigma^2}} \sin\left(\frac{2i\bar{b}\mu_2}{\sigma}\right) \quad (3)$$

301 Odd and even parts of Gabor filters describe different types of receptive field profiles of simple cells  
302 observed in V1. Odd receptive field profiles are able to detect contours and therefore are used to detect the  
303 presence of a surface in an image, such as the central surface presented in the Poggendorff illusion. In this

Retsa et al.

304 case,  $\theta \in [-\pi, \pi)$ . Even receptive field profiles are sensitive to line orientation, and for this reason  $\theta \in$   
305  $[0, \pi)$

306 As shown by Citti and Sarti (Citti & Sarti, 2006), the organization of simple cells in V1 responds to a group  
307 law that allows to retrieve  $(x, y, \theta)$  position of simple cells receptive fields in the hypercolumnar structure  
308 of V1.  $(x, y, \theta)$  is retrieved by means of a rotation and a translation of a mother cell placed at the origin of  
309 our space,  $\mathbb{R}^2 \times S^1$ , where  $\mathbb{R}^2$  encodes the spatial features while  $S^1$  the orientation selection.  
310 If we identify the retinal plane with the  $\mathbb{R}^2$ -plane, then the spike frequencies  $O(x, y, \theta)$  of the neurons  
311 activating at the global coordinates  $(x, y)$  are modeled as the convolution between the visual stimulus  $I:$   
312  $D \subset \mathbb{R}^2 \rightarrow \mathbb{R}^+$  with the set of Gabor filters. The expression for this output becomes the following:

$$O_{(x,y,\theta)} = \int_D I(\mu_1, \mu_2) \psi_{(x,y,\theta)}(\mu_1, \mu_2) d\mu_1 d\mu_2, \quad (4)$$

313 where  $\{\psi_{(x,y,\theta)}\}_{(x,y,\theta) \in \mathbb{R}^2 \times S^1}$  is the set of Gabor filters,  $D \subset \mathbb{R}^2$ . By means of this mechanism, we mimic  
314 the orientation selectivity process, i.e. the short-range or intracortical connectivity, as described in the  
315 experimental works of Hubel and Wiesel (Hubel & Wiesel, 1962). In the Hering and Zöllner illusions, the  
316 maximum output among all possible instances of orientations is given by  $E(x, y, \theta) = \|O(x, y, \theta)\|$ , i.e. the  
317 Energy, or Complex module of the output presented in Equation (4). This output is specific for line  
318 detection, therefore  $\theta \in [0, \pi)$ . In the Poggendorff illusion, the output has the following expression:

$$P(O) = P(x, y) = \text{Re}(O(x, y, \theta))^2 + \text{Im}(O(x, y, \theta)), \quad (5)$$

319 where again  $O(x, y, \theta)$  is the output of simple cells defined in Equation (4). This formulation facilitates the  
320 detection of both the presence of lines, thanks to the contribution of the Real part in Equation (2) and the  
321 presence and polarity of contours thanks to the term in Equation (3). Therefore  $\theta \in [-\pi, \pi)$ .  $P(x, y)$  is then  
322 normalized and shifted to positive values, obtaining the following external cost  $C$ :  
323

$$C(O) = C(x, y) = \frac{c + P(x, y)}{\sqrt{c + P(x, y)^2}}, \quad (6)$$

324 where  $c$  is a suitable positive constant. Both the Energy  $E(x, y, \theta)$  and the external cost  $C(O)$  simulate the  
325 intracortical connectivity of V1/V2.

326 Once every simple cell in the features space  $\mathbb{R}^2 \times S^1$  has been assigned with an output by means of  
327 the simulated intra-cortical connectivity ( $E(x, y, \theta)$  and  $C(O)$ ), the next step is to explain how long-range  
328 horizontal connections, i.e. connections between cells of approximately *the same orientation* belonging to  
329 different hypercolumns (and by extension responding to different regions of the visual field) is taken into

Retsa et al.

330 account by the model. Citti and Sarti (Citti & Sarti, 2006) proposed to endow the  $\mathbb{R}^2 \times S^1$  features space with  
 331 a sub-Riemannian metric, which allows us to weigh differently the direction of propagation of the long  
 332 range connectivity of V1 and V2. In (B. Franceschiello et al., 2019; Benedetta Franceschiello et al., 2017)  
 333 the model presented in (Citti & Sarti, 2006) is extended to take into account how the long-range connectivity  
 334 is polarized by the output of simple cells. As the nature of the illusions is different, two different approaches  
 335 are proposed, as detailed in (B. Franceschiello et al., 2019; Benedetta Franceschiello et al., 2017).

336 *Hering and Zöllner illusions*. A connectivity metric tensor is defined by combining a long-range  
 337 connectivity metric in  $\mathbb{R}^2 \times S^1$  with the output  $E(x, y, \theta)$ , for every orientation instance of the hypercolumn,  
 338 as follows:

$$\frac{E(x, y, \theta)}{\int_0^\pi E(x, y, \theta) d\theta} \begin{pmatrix} \cos^2 \theta & \sin \theta \cos \theta \\ \sin \theta \cos \theta & \sin^2 \theta \end{pmatrix}. \quad (7)$$

339 The second part of the expression represents a 2-dimensional connectivity metric tensor along the directions  
 340  $\{\partial_x, \partial_y\}$ , in the roto-translation group coordinate system. Summing up (integrating) the contribution along  
 341 the hypercolumn we obtain a 2-dimensional deformation tensor with principal eigenvector along the  
 342 orientation  $\bar{\theta}$ , corresponding to the maximum output of the energy within the hypercolumn:

$$p(x, y) = \alpha^{-1} \frac{\int_0^\pi E(x, y, \theta) \begin{pmatrix} \cos^2 \theta & \sin \theta \cos \theta \\ \sin \theta \cos \theta & \sin^2 \theta \end{pmatrix} d\theta}{\int_0^\pi E(x, y, \theta) d\theta}, \quad \alpha \in \mathbb{R} \quad (8)$$

Retsa et al.

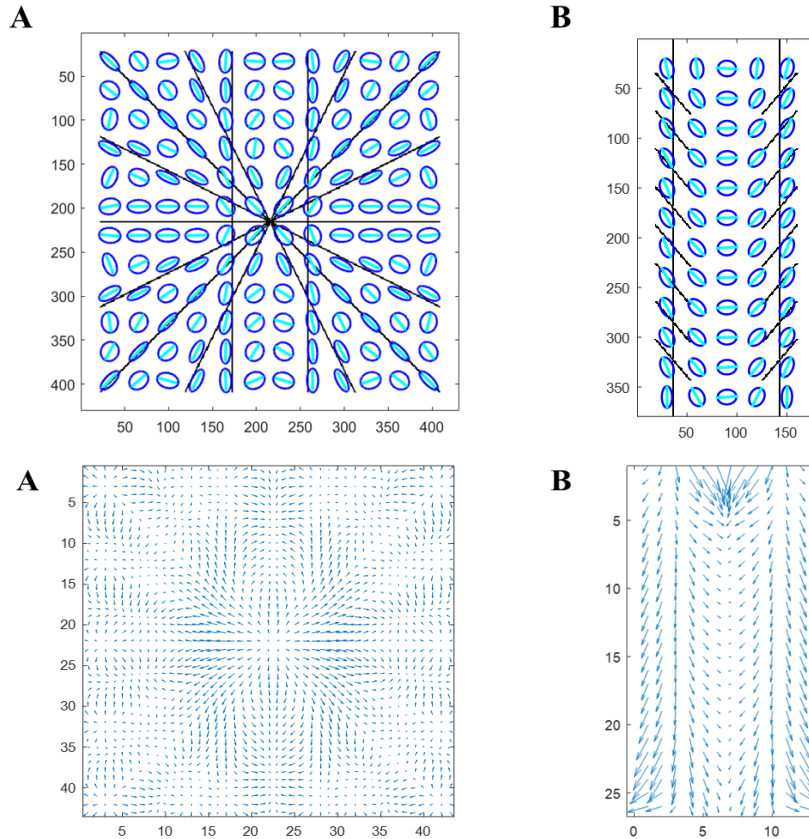

**Figure 2.** (Top row) Representation of  $p$ . In blue, representation of a tensor field. In cyan, the eigenvector corresponding to the principal eigenvalue. **A.** Example of one stimulus of the Hering illusion (7 background lines and 4cm distance between vertical lines). **B.** Example of one stimulus of the Zöllner illusion (10 inducers and  $65^\circ$  for the inducer's angle). (Bottom row) Computed displacement field  $\bar{u}$ . **A.** Example for one of the stimuli of the Hering illusion (7 background lines and 4cm distance between vertical lines). **B.** Example of one stimulus of the Zöllner illusion (10 inducers and  $65^\circ$  for the inducer's angle).

343 By plugging in the components of the inverse matrix of  $p(x, y)$  inside the following equation:

$$\begin{cases} \Delta u_1 = \frac{\partial}{\partial x_1} p_{11} + 2 \frac{\partial}{\partial x_2} p_{12} - \frac{\partial}{\partial x_1} p_{22} & \text{in } D \quad (9) \\ \Delta u_2 = \frac{\partial}{\partial x_2} p_{22} + 2 \frac{\partial}{\partial x_1} p_{12} - \frac{\partial}{\partial x_2} p_{11} \\ \frac{\partial}{\partial n} u_1 = 0 \\ \frac{\partial}{\partial n} u_2 = 0 \end{cases} \quad \text{in } \partial D$$

344 it is possible as detailed in (Benedetta Franceschiello et al., 2017) to recover the displacement field  $\bar{u} = (u_1,$   
 345  $u_2)$ , see Figure 2 (by solving (9)). The differential equation introduced in the formula before approximates  
 346 the connectivity patterns between different hyper-columns as some diffusive propagation of single cells  
 347 responses, complementing the intra-cortical connectivity patterns.

348 *Poggendorff illusion.* The basic idea presented in (B. Franceschiello et al., 2019) is to provide a natural  
 349 environment for this type of illusion by means of geometrical elements and to model the perceptual curves

Retsa et al.

350 as length minimizers of a cortical metric. Starting from the sub-Riemannian metric in (Citti & Sarti, 2006),  
351 we weigh the long-range connectivity considering the intra-columnar response  $P(O)$ , see Equation (5), of  
352 simple cells in V1/V2. The polarized metric becomes:

$$G = \begin{pmatrix} \frac{1}{c_\xi(O)} & 0 \\ 0 & \frac{1}{c(O)} \end{pmatrix}, \quad (10)$$

353 where  $C_\xi(O) = \xi^2 C(O)$ ,  $C(O)$  is defined in Equation (6). The top left term weights the  $\mathbb{R}^2$  component of the  
354 space while the bottom right the rotational  $S^1$  component.  $\xi > 0$  is a real parameter, therefore allowing to  
355 modulate the anisotropy between the retinal (on  $\mathbb{R}^2$ ) and the hypercolumnar ( $S^1$ ) components. In the case of  
356 the Poggendorff illusion, the reconstructed perceived misalignment is described by the minimizing geodesic  
357 between two a priori known sets, obtained by fixing the point  $(x, y, \theta)$  on the left side of the surface and  
358 looking for another point  $(x_1, y_1, \theta)$  on the right side of the surface, where we fix everything except for  $y_1$ .  
359 The illusory curves will be minimal with respect to the metric induced by the geometry of the primary  
360 visual cortex, i.e. the deformation curves arise as geodesics of the metric  $G$ , Equation (10).

361 Computation of sub-Riemannian distances in general is a very difficult problem (Montgomery, 2006). By  
362 introducing a Riemannian approximation of the metric, the problem becomes solvable and geodesics  
363 (perceptual curves) arise as solutions of the Riemannian Eikonal equation (Mirebeau, 2018; Sanguinetti et  
364 al., 2015).

365  
366 *Numerical Implementation.* For the implementation of the mathematical models described above, we use  
367 MATLAB ver. R2019a. The initial images used for the behavioral test were extracted and resized manually,  
368 to optimize the computation time dependent on the size of the initial image. For the three illusions, the  
369 original stimuli were images of size 2880x1800 pixels, first cropped along the horizontal and vertical  
370 directions to obtain a square of size 1800x1800 pixels (Hering), a rectangle of 592x1267 pixels (Zöllner)  
371 and a rectangle of 770x1540 pixels (Poggendorff). The three images were then scaled by a factor 4.18, 3.34  
372 and 3.85, respectively, obtaining final images with sizes 430x430 pixels (Hering), 177x379 pixels (Zöllner)  
373 and 200x400 pixels (Poggendorff). The resized images corresponding to the stimuli were convolved with  
374 a set of Gabor filters ( $N=36$  orientations for the Hering and Zöllner,  $N = 32$  for the orientation of lines  
375 extraction in the Poggendorff illusion and  $N=62$  for the surface contour orientation extraction).

376 The number  $N$  of orientations stated above was computed as equally spaced steps within the two intervals,  
377 the latter being  $\theta \in [0, \pi)$  (for the Hering, the Zöllner and the Poggendorff) and  $\theta \in [-\pi, \pi)$  (for the  
378 Poggendorff), depending on the features extracted (i.e. lines or contours as detailed above).

Retsa et al.

379 The implementation of the Gabor filters is the one presented in (Petkov & Subramanian, 2007), setting the  
380 required parameter  $\lambda = 0$ . According to Daugman (Daugman, 1985), Gabor filters simulate the receptive  
381 field profiles of simple cells in V1/V2 responsible for the orientation tuning. The size of the Gabor patch,  
382 i.e. the dimensions of the filter windows in pixels, was varied across illusions by tuning  $\sigma$ . The  
383 implementation of Gabor filters in Matlab is available in  
384 [http://www.cs.rug.nl/~imaging/spatiotemporal\\_Gabor\\_function/GaborKernel3d.m](http://www.cs.rug.nl/~imaging/spatiotemporal_Gabor_function/GaborKernel3d.m) (Petkov &  
385 Subramanian, 2007). The Gabor filters' parameters were fixed for all presentations of the same illusion:  
386  $\gamma = 0.5$ ;  $\bar{b} = 0.56$ ;  $\sigma = 7.84$  for the Hering;  $\gamma = 0.5$ ;  $\bar{b} = 0.56$ ;  $\sigma = 11.2$  for the Zollner;  $\gamma = 1$ ;  $\bar{b} =$   
387  $0.56$ ;  $\sigma = 3$  for the orientation of lines extraction in the Poggendorff; and  $\gamma = 1$ ;  $\bar{b} = 0.56$ ;  $\sigma = 7$  for the  
388 orientation of contours extraction in the Poggendorff. These parameters were fixed based on previous  
389 computational studies in accord with a qualitative reconstruction of the percept (B. Franceschiello et al.,  
390 2019; Benedetta Franceschiello et al., 2017). In the Hering and Zöllner illusion a constant  $c = 0.037, 0.03$   
391 respectively scales the displacement vector fields  $\bar{u} = (x_1, x_2)$  once applied to the initial image to reconstruct  
392 the percept. In the Poggendorff experiment, the parameter  $\xi$  – which modulates the anisotropy between the  
393 two direction,  $\xi\Delta x_1 = \Delta\theta$ , where  $\Delta x_1, \Delta\theta$  are the discretization steps along  $x_1$  and  $\theta$  – is chosen based on the  
394 entry angle for the transversal line and the width of the central surface. The geodesics are computed through  
395 the Sub-Riemannian Fast-Marching, as implemented in (Sanguinetti et al., 2015). The parameter  $\epsilon$  indicates  
396 the Riemannian approximation and in our experiments is set equal 0.1. Table 1 shows the values of  $\xi$  for  
397 the presented experiments.

398

| Central Width | Crossing Line Angle | $\xi$ |
|---------------|---------------------|-------|
| 2 cm          | 30°                 | 30    |
|               | 60°                 | 13    |
|               | 90°                 | 10    |
| 4 cm          | 30°                 | 30    |
|               | 60°                 | 13    |
|               | 90°                 | 10    |
| 6 cm          | 30°                 | 30    |
|               | 60°                 | 20    |
|               | 90°                 | 17    |

Table 1. Chosen values for  $\xi$

399

400 *Bias calculation in the computational results.* The computational model, once tuned, was fitted with the  
401 outcome of the behavioral results according to the variable of interest of the three detailed geometrical  
402 optical illusions. As our goal is to compare the results obtained in the behavioral experiments with the



Retsa et al.

403 resulting biases of the computational protocol, the definitions of bias are the same as those given in the  
404 behavioral bias paragraph. However, the way the bias is extracted in the computational case is clearly  
405 different, but it has been standardized in order to reduce any variability induced by a manual extraction of  
406 the measures.

407

408 *Computational bias Hering illusion.* To recall the definition, the bias is the horizontal distance between the  
409 straight vertical line of the neutral configuration and the curve computed by the model. To calculate it in a  
410 standardized way, we extracted the distance between point 1 and 2, see Figure 3 (A) for reference, which  
411 corresponds to the value in pixels of the displacement vector field  $\bar{u} = (u_1, u_2)$  computed at point 1,  
412 multiplied by the constant  $c=0.037$ , see *Numerical Explanation section*.

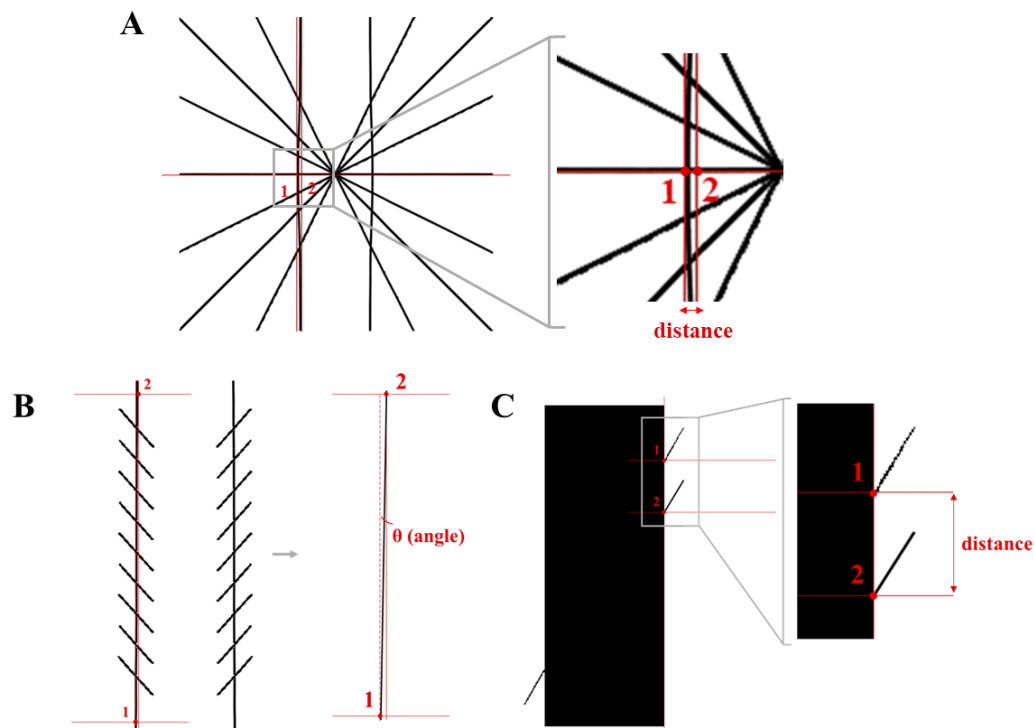

*Figure 3. Bias calculation for the computational modelling.* 1 and 2 indicate the two reference points for the bias calculation. **A.** Hering illusion. The bias corresponds to the distance between the original vertical line position and the tangent in the point of the maximal curvature. **B.** Zöllner illusion. The bias refers to the angle rotation ( $\theta$ ) of the modelled line. **C.** Poggendorff illusion. The bias is the distance along the right side of the central surface between the initial position of the right segment line and the modelled one.

413 *Computational bias Zöllner illusion.* The bias refers to the angle created between the modelled vertical line  
414 and the original parallel one. To calculate the angle, we choose two points in the final image: the first one  
415 on the bottom of the left of the left perceptual reconstructed line  $(x_1, y_1)$ , and the second on the top of the  
416 same line  $(x_2, y_2)$ , see Figure 3 (B). The rotation angle is computed as  $\text{atan}\left(\frac{x_2 - x_1}{y_2 - y_1}\right)$ . The result is then  
417 converted from radians to degrees.

Retsa et al.

418 *Computational bias Poggendorff illusion*. The bias for Poggendorff is again calculated as the vertical  
419 distance between the reconstructed segment corresponding to the perceptual alignment and the neutral  
420 configuration (in which the left and right segments are aligned). The computational bias then results as the  
421 difference in pixels between the original y-coordinate of the physically aligned segment and the y-  
422 coordinate of the segment obtained through our algorithm (Figure 3 (C)).

### 423 **Tuning the computational model through behavioral results**

424 As described in the numerical implementation section, the computational models used to simulate the  
425 perceptual behavior of the visual cortex that generates the perception of geometrical optical illusions depend  
426 on a series of parameters. Such parameters do have an interpretation from the neurophysiological standpoint  
427 and therefore impact the fitting of the computational curves with the behavioral ones. By *tuning the*  
428 *computational models*, we refer to the practice of iteratively modifying these parameters in a fashion that  
429 would lead to optimally fit the computational biases with the behavioral ones. This practice is particularly  
430 advantageous in the case of neural-based models, like in our case, i.e. those models that depend on  
431 parameters characterizing low-level visual processes, including simple-cell feature extraction and long-  
432 range connectivity.

433

### 434 **Comparison between computational and behavioral biases**

435 The computational results were then compared with the behavioral ones to tune the model and evaluate its  
436 prediction. Different sets of initial parameters for the size of receptive fields (encoded by the  $\sigma$  of the Gabor  
437 filter) were tried before choosing those described in the *Numerical implementation* subsection. The final  
438 value of  $\sigma$  was chosen as the instance maximizing the fitting between computational and behavioral curves  
439 (minimizing the error), and remained fixed across different conditions of the same illusion. The comparison  
440 between computational and behavioral biases of the Zöllner illusions was straightforward, as the compared  
441 variables are both in degrees. To ensure the same comparison between the distances extracted in the Hering  
442 and Poggendorff illusions, the bias is expressed in percentages; in the Hering illusion as  
443  $\frac{Bias}{Length\_of\_the\_positive\_x\_semi\_axis} \cdot 100\%$  ; in the Poggendorff illusion is computed as  $\frac{Bias}{Total\_size\_rectangle} \cdot$   
444 100%. In this way, the behavioral measures extracted in cm become comparable with the computational  
445 measures in pixels.

446

## 447 **Results**

Retsa et al.

## 448 Behavioral results

449 Results of the psychophysical experiments are shown in Figure 4. Biases were calculated as detailed in  
 450 Sect. 2.1.4. The average size of the illusion (bias) for each task was submitted to a  $3 \times 3$  repeated measures  
 451 ANOVA (see 2.1.4), as the distribution of the data was Gaussian. Reported F and p values reflect  
 452 Greenhouse-Geisser correction for non-sphericity when necessary.

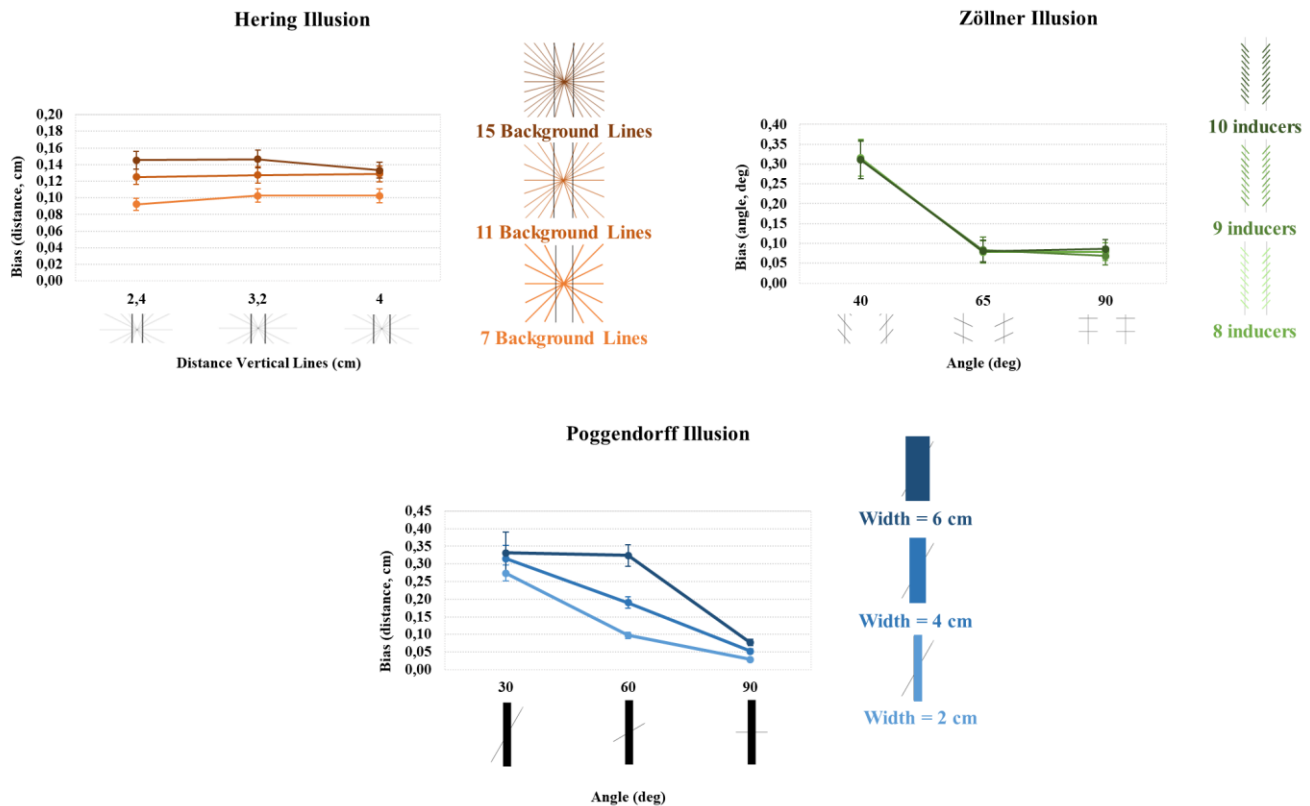

**Figure 4. Behavioral Results.** **Hering illusion:** Mean sizes of illusion for the three different number of background lines are shown as a function of the three distances between the two vertical lines. Error bars: standard error of the mean. **Zöllner illusion:** Mean biases (in absolute value) for the three different number of inducers are shown as a function of the three levels of angles. Error bars: standard errors. **Poggendorff illusion:** Mean sizes of illusion (in absolute value) for the three different widths of the central surface are shown as a function of the three levels of angles. Error bars: standard errors.

453  
 454 *Hering illusion.* There was a main effect of the number of radial lines ( $F(1.54, 44.63) = 121.997, p < 0.001, \eta^2_p = 0.808$ ), indicating that the participants' bias increased as the number of radial lines increased: the more  
 455 the radial lines, the larger the bias. 7 lines (average bias = 0.0992), 11 lines (average bias = 0.1272), 15  
 456 lines (average bias = 0.1417). No significant effect of the distance between the vertical lines was observed  
 457 ( $F(1.29, 37.42) = 0.8, p = 0.4$ ). However, there was a significant interaction between the number of radial  
 458 lines and the distance between the vertical lines ( $F(2.9, 84.17) = 5.79, p < 0.01, \eta^2_p = 0.166$ ). Bias was  
 459 significantly above 0 in all conditions (Hering:  $t(29) \geq 12.30, p < .001$ ). Inspection of the results suggests  
 460 that whereas for the medium number of lines (11), the distance between the vertical lines has no effect on  
 461

Retsa et al.

462 the bias, for both the 7 lines and the 15 lines conditions distance affects the bias but in opposite ways. Post-  
 463 hoc one-way ANOVAs that examined the effect of distance for each line condition, separately, confirmed  
 464 these observations. Specifically, no effect of distance was found for the 11 lines condition. In contrast, a  
 465 significant effect of distance was found for both the 7 lines condition ( $F(1.34, 38.91)=5.46, p=0.01,$   
 466  $\eta^2_p=0.16$ ) and the 15 lines condition ( $F(1.49, 43.2)=3.45, p=0.05, \eta^2_p=0.106$ ). In the case of the 7 lines  
 467 condition, participants' bias was significantly smaller for the 2.4cm distance condition (bias=0.0923)  
 468 compared to both 3.2cm (bias =0.1025) and 4cm (bias =0.1027) ( $p=0.01$ ) (Table 2). Finally, in the case of  
 469 the 15 lines condition, participants' bias was found to be significantly smaller for the largest distance  
 470 condition (bias=0.1332) compared to the medium distance condition (bias=0.1464) ( $p<0.05$ ) (Table 2).  
 471 The bias for the smallest distance condition was very similar to the medium distance one (bias=0.1455)  
 472 (Table 2).

| Radial lines | Vertical lines distance | Averaged behavioral bias (distance, cm) | Standard error of behavioral bias | Predicted computational bias (distance, pixels) |
|--------------|-------------------------|-----------------------------------------|-----------------------------------|-------------------------------------------------|
| 15 lines     | 2.4 cm                  | 0.1455                                  | 0.0107                            | 2.41                                            |
|              | 3.2 cm                  | 0.1464                                  | 0.0107                            | 2.51                                            |
|              | 4 cm                    | 0.1332                                  | 0.0096                            | 3.01                                            |
| 11 lines     | 2.4 cm                  | 0.1253                                  | 0.0088                            | 2.83                                            |
|              | 3.2 cm                  | 0.1273                                  | 0.0100                            | 2.76                                            |
|              | 4 cm                    | 0.1288                                  | 0.0093                            | 3.19                                            |
| 7 lines      | 2.4 cm                  | 0.0923                                  | 0.0073                            | 3.08                                            |
|              | 3.2 cm                  | 0.1025                                  | 0.0081                            | 2.70                                            |
|              | 4 cm                    | 0.1027                                  | 0.0083                            | 2.85                                            |

473 *Table 2 Behavioral and computational results for Hering illusion.* Average bias and standard errors are shown per stimulus

474 *Zöllner illusion.* There was a significant main effect of inducer angle on the measured bias ( $F(1.18,$   
 475  $34.29)=105.309, p<0.001, \eta^2_p=0.784$ ), indicating that the illusion size is larger when the inducers' angle is  
 476  $40^\circ$  (average bias= $-0.312^\circ$ ) compared to both  $65^\circ$  (average bias= $0.081^\circ$ ) and  $90^\circ$  (average bias= $0.078^\circ$ ) (see  
 477 for comparison Table 3). Neither the effect of the number of inducers ( $F(2, 58)=0.384, p=0.683, \eta^2_p=0.013$ )  
 478 nor the interaction between the two factors ( $F(4, 116)=0.486, p=0.746, \eta^2_p=0.013$ ) were significant. Bias  
 479 was significantly above 0 when lines inclination was  $90^\circ$  ( $t(29) \geq 3.02, p < .005$ ) and  $65^\circ$  ( $t(29) \geq 2.56,$

Retsa et al.

480  $p < .016$ ; stats for 8,9,10 lines). In the illusory conditions - i.e. when lines inclination was  $40^\circ$  - bias was  
 481 below 0 ( $t(29) \leq -6.48$ ,  $p < .001$ ), Table 3.

| Number inducers | Inducers' angle | Averaged behavioral bias (deg) | Standard error of behavioral bias | Predicted bias computational (deg) |
|-----------------|-----------------|--------------------------------|-----------------------------------|------------------------------------|
| 10 inducers     | $40^\circ$      | -0.3108                        | 0.048                             | 0.3918                             |
|                 | $65^\circ$      | 0.0806                         | 0.027                             | 0.0953                             |
|                 | $90^\circ$      | 0.0858                         | 0.024                             | 0.0000                             |
| 9 inducers      | $40^\circ$      | -0.3110                        | 0.047                             | 0.2899                             |
|                 | $65^\circ$      | 0.0838                         | 0.033                             | 0.0957                             |
|                 | $90^\circ$      | 0.0686                         | 0.023                             | 0.0000                             |
| 8 inducers      | $40^\circ$      | -0.3156                        | 0.046                             | 0.3940                             |
|                 | $65^\circ$      | 0.0779                         | 0.028                             | 0.1942                             |
|                 | $90^\circ$      | 0.0785                         | 0.022                             | 0.0000                             |

482 *Table 3 Behavioral and computational results for Zöllner illusion. Average bias and standard errors are shown per stimulus.*

483 *Poggendorff illusion.* There was a significant main effect of the rectangle's width on the measured bias (F  
 484 (1.5, 33.3)=13.319,  $p=0.001$ ,  $\eta^2_p=0.315$ ). Participants' bias increased as the rectangle's width increased:  
 485 2cm (average bias = -0.114cm), 4cm (average bias = -0.151cm), 6cm (average bias=-0.193cm). A  
 486 significant effect of the angle of the line segments was also observed (F (1.4, 40.87)=67.167,  $p<0.001$ ,  
 487  $\eta^2_p=0.698$ ). The smaller the angle, the larger the bias:  $30^\circ$  (average bias =-0.307cm),  $60^\circ$  (average bias=-  
 488 0.204cm), and  $90^\circ$  (average bias=0.053cm). Furthermore, the interaction between these two factors was  
 489 also significant (F(1.98,57.56)=19.193, $p<0.001$ ,  $\eta^2_p=0.398$ ). Bias was significantly above 0 in control  
 490 conditions (i.e.,  $90^\circ$ ;  $t(29) \geq 6.67$ ,  $p < .001$ ) and significantly below 0 in the illusory conditions (i.e.  $30^\circ$   
 491 and  $60^\circ$ ,  $t(29) \leq -5.52$ ,  $p < .001$ ). Inspection of the results suggested that the width of the rectangle affected  
 492 participants' bias in the  $60^\circ$  and  $90^\circ$  angles condition. Post-hoc one-way ANOVAs that examined the effect  
 493 of rectangle's width for each angle condition separately demonstrated that whereas the rectangle's width  
 494 had no effect on the participants' bias in the  $30^\circ$  angle, in both  $60^\circ$  and  $90^\circ$ , rectangle's width significantly  
 495 affected the bias (F(1.13, 32.82)=63.34,  $p<0.001$ ,  $\eta^2_p=0.686$  and F(1.13, 32.85)=68,  $p<0.001$ ,  $\eta^2_p=0.701$ ,  
 496 respectively). In both  $60^\circ$  and  $90^\circ$  conditions, participants' bias increased as the rectangle's width increased  
 497 (Table 4). In  $60^\circ$ : 2cm (bias = -0.098cm), 4cm (bias = -0.190cm), 6cm (bias=-0.324cm), all significantly

Retsa et al.

498 different from each other ( $p < 0.001$ ); and in  $90^\circ$ : 2cm (bias=0.029cm), 4cm (bias=0.052cm), 6cm  
 499 (bias=0.076cm), all significantly different from each other,  $p < 0.001$ , Table 4.

500

| Central width | Crossing line angle | Averaged behavioral bias (distance, cm) | Standard error of behavioral bias | Predicted bias (distance, pixels) |
|---------------|---------------------|-----------------------------------------|-----------------------------------|-----------------------------------|
| 6 cm          | $30^\circ$          | -0.3310                                 | 0.0599                            | 60                                |
|               | $60^\circ$          | -0.3242                                 | 0.0305                            | 12                                |
|               | $90^\circ$          | 0.0765                                  | 0.0091                            | 0                                 |
| 4 cm          | $30^\circ$          | -0.3153                                 | 0.0376                            | 36                                |
|               | $60^\circ$          | -0.1904                                 | 0.0164                            | 6                                 |
|               | $90^\circ$          | 0.0524                                  | 0.0064                            | 0                                 |
| 2 cm          | $30^\circ$          | -0.2742                                 | 0.0231                            | 18                                |
|               | $60^\circ$          | -0.0976                                 | 0.0088                            | 6                                 |
|               | $90^\circ$          | 0.0288                                  | 0.0043                            | 0                                 |

501 *Table 4. Behavioral and computational results for Poggendorff illusion. Average bias and standard errors are shown per stimulus*

502

### 503 *Computational model results*

504 *Hering illusion.* Predicted biases for this illusion are shown in Table 2. An example of a constructed percept  
 505 is shown in Figure 6. Predicted biases were calculated as detailed in the *Methods section*. For 15 radial  
 506 lines, the bias increases as the distance between the two vertical lines does: 2.4cm (bias = 2.41 px), 3.2cm  
 507 (bias = 2.51 px), 4cm (bias = 3.01 px). In the 11 background lines condition, the computed bias is similar  
 508 for the 2.4 cm and 3.2 cm conditions: 2.83 px and 2.76 px, respectively; for the 4 cm case the bias is 3.19  
 509 px. For 7 radial lines, the bias oscillates around the same values: 2.4cm (bias = 3.08 px), 3.2cm (bias = 2.70  
 510 px), 4 cm (bias = 2.85 px). The computed bias slightly increases as the number of radial lines passes from  
 511 7 to 11: 7 lines (average bias = 2.88 px), 11 lines (bias = 2.93 px). It decreases in the 15 lines example (bias  
 512 = 2.64 px). The distance between the two vertical lines seems to play a role on the predicted bias in the

Retsa et al.

513 computational approach when the distance passes from 3.2 to 4 cm: 2.4cm (average bias = 2.77 px ), 3.2cm  
514 (average bias = 2.65 px), 4cm (average bias = 3.01 px).

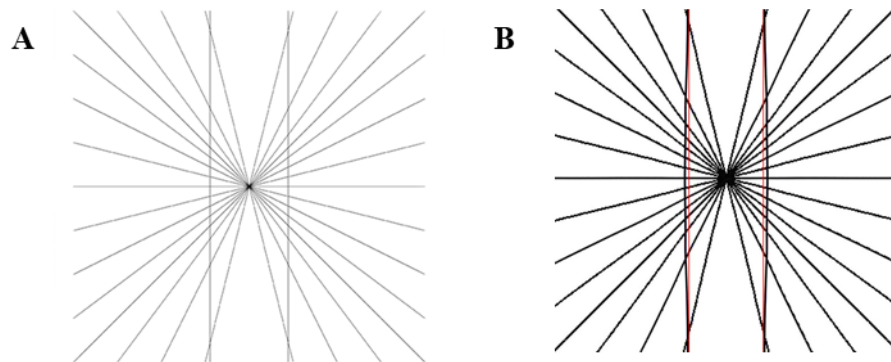

*Figure 6. Hering stimuli: 15 background lines and 4 cm of distance between the vertical lines. A. Original stimulus. B. Constructed stimulus. In red, the two original vertical lines are shown, obtained with  $c = 0.02$ .*

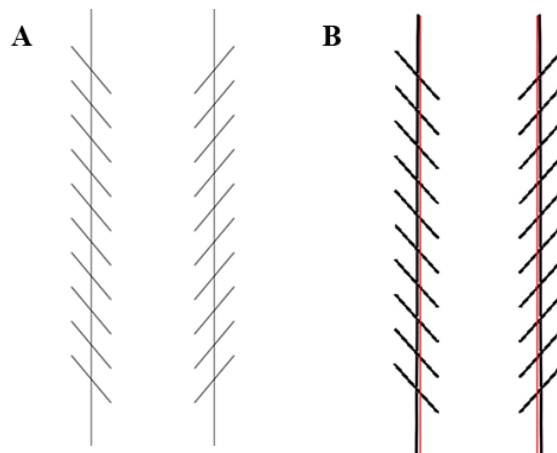

*Figure 5. Zöllner stimuli: 10 inducers of 40°. A. Original stimulus. B. Constructed stimulus. In red, the two original vertical lines are shown*

515 *Zöllner illusion*. Computed biases for this illusion are shown in Table 3. An example of a constructed  
516 percept is shown in Figure 5. For 10 inducers, the bias decreases from the 40° condition to the 65° condition:  
517 40° (bias=0.3918°), 65° (bias = 0.0953°); and it goes to zero in the 90° condition. For 9 inducers, the bias  
518 decreases from the 40° condition to the 65° condition. In the case of angle of the inducers equal to 40°, the  
519 computed bias is 0.2899°, for 65° is 0.0957°. It goes to 0° when the angle is 90°. For 8 inducers, the bias is  
520 0.3940° when the angle of inducers is 40° and it decreases to 0.1942° when the angles are 65°, to 0° when  
521 the angle is 90°.

522 There is a clear relation between the computed bias and the angle of the inducers, since the illusory bias  
523 increases when the inducers' angle decreases from 40° (average bias =0.36°) to both 65° (average bias =  
524 0.1284°) and 90° (average bias =0.0000°). However, there is no clear relation between the bias and the

Retsa et al.

525 number of inducers on the predicted bias: 10 inducers (average bias =  $0.16^\circ$ ), 9 inducers (average bias =  
526  $0.13^\circ$ ), 8 inducers (average bias =  $0.1961^\circ$ ).

527 *Poggendorff illusion*. Modelled biases for this illusion are shown in Table 4. An example of a constructed  
528 percept is shown in Figure 7. For a central surface width of 6 cm, the bias decreases as the angle increases:  
529  $30^\circ$  (bias = 60 px),  $60^\circ$  (bias = 12 px),  $90^\circ$  (bias = 0 px). For the 4 cm width condition, the same happens:  
530  $30^\circ$  (bias = 36 px),  $60^\circ$  (bias = 6 px),  $90^\circ$  (bias = 0 px). And as well for the 2 cm width:  $30^\circ$  (bias = 18 px),  
531  $60^\circ$  (bias = 6 px),  $90^\circ$  (bias = 0 px). Comparing the predicted biases based on the central surface width, the  
532 bias increases as the width of the rectangle increases: 2 cm (average bias = 8 px), 4 cm (average bias = 14  
533 px), 6 cm (average bias = 24 px). Whereas, when the angle of the crossing line is considered, the bias  
534 decreases when the angle increases:  $30^\circ$  (average bias = 38 px),  $60^\circ$  (average bias = 8 px),  $90^\circ$  (average  
535 bias = 0 px).

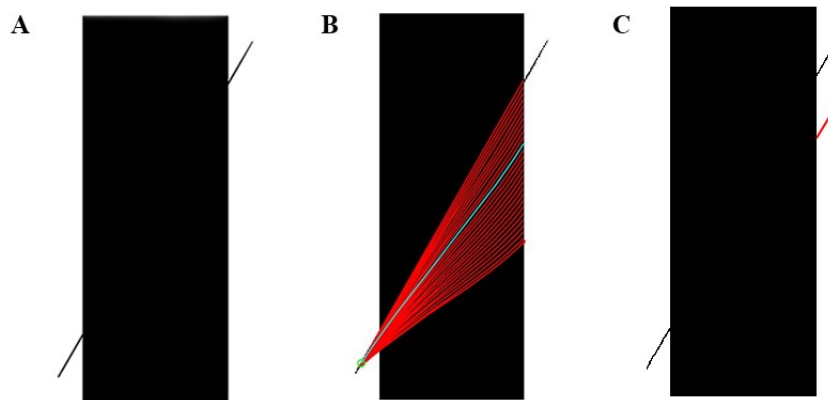

Figure 7. Poggendorff stimuli:  $30^\circ$  for the crossing line angle and 6 cm of central surface width. **A**. Original stimulus. **B**. Computed geodesics. The perceptual curve is shown in cyan. **C**. Constructed stimulus. In red, the computed percept

## 536 Comparison behavioral and computational results

537 The comparison between the results of the two approaches: behavioral and computational results are shown  
538 in Figure 8, Figure 9 and Figure 10, listed in Table 5, Table 6 and Table 7, and detailed by geometrical  
539 optical illusion (Hering, Zollner and Poggendorff, respectively. B stands for behavioral curve, C for  
540 computational and D for difference curve in the figures). A comprehensive 3D visualization of the  
541 differences between behavioral and computational biases across illusion is reported in Figure 11. The  
542 comparison refers to the difference between the tuned computational model, as detailed in the  
543 corresponding Methods section, and the behavioral results. An example of not-fitted computational curve



Retsa et al.

544 is given for the Hering illusion ( $c = 0.017$ ) in Figure 8, where it is clearly depicted how the behavioral  
 545 values serve as benchmarks to run multiple simulations of the computational model until an optimal fitting  
 546 is reached ( $c = 0.037$ ). In the Hering illusion, the difference curves are flat and differ overall by less than  
 547 0.50% (which represents about 30% of the maximum perceived bias), with the best fit achieved in the 11

### Hering Illusion - Comparison

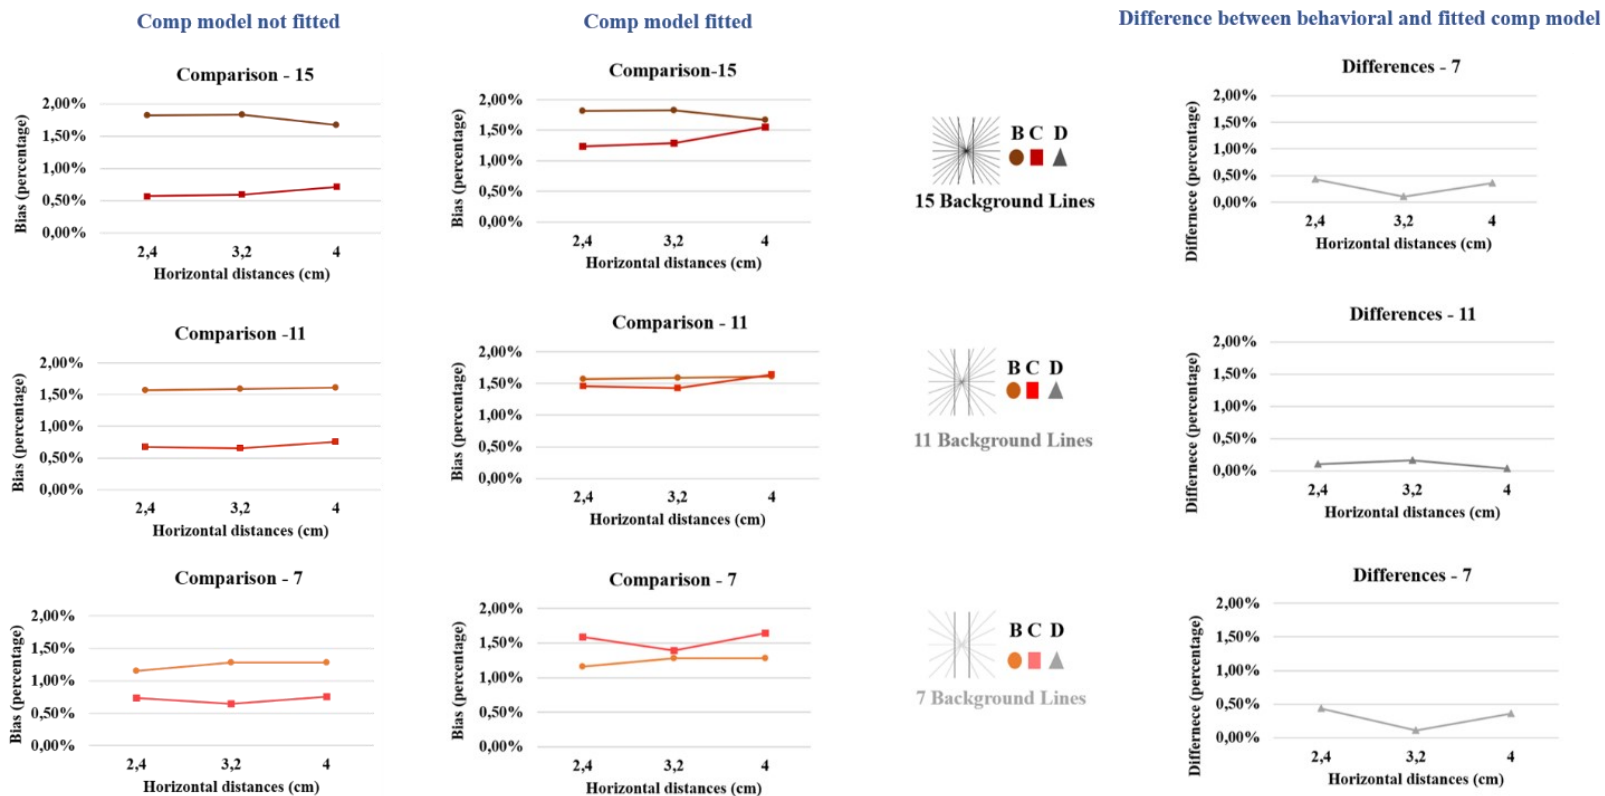

Figure 8. Comparison computational and behavioral results for the Hering illusion. **Left block:** Comparison of the behavioral and computational biases, in the left column the computational model does not fit the behavioral results ( $c = 0.017$ ) while in the right column of the block it does ( $c = 0.037$ ). In the computational cases – values for the predicted bias for the different number of background lines are shown as a function of the three distances between the two vertical lines. In the behavioral – mean sizes of illusion for the three different number of background lines are shown as a function of the three distances between the two vertical lines. **Right:** Differences between the behavioral and computational biases fitting the behavioral values. Values for the differences between the observed bias and the predicted bias for the different number of background lines are shown as a function of the three distances between the two vertical lines.

548 lines case. Both of the computational models used here to mimic the perceptual behavior rely on the  
 549 simulation of neurophysiological processes such as single cells responses and long-range connectivity in  
 550 the visual areas. These models deal with different GOIs in a similar fashion to how the human visual system

Retsa et al.

551 responds, making the differences across GOIs look similar for human behavior and computational  
 552 modeling.

### Zöllner Illusion - Comparison

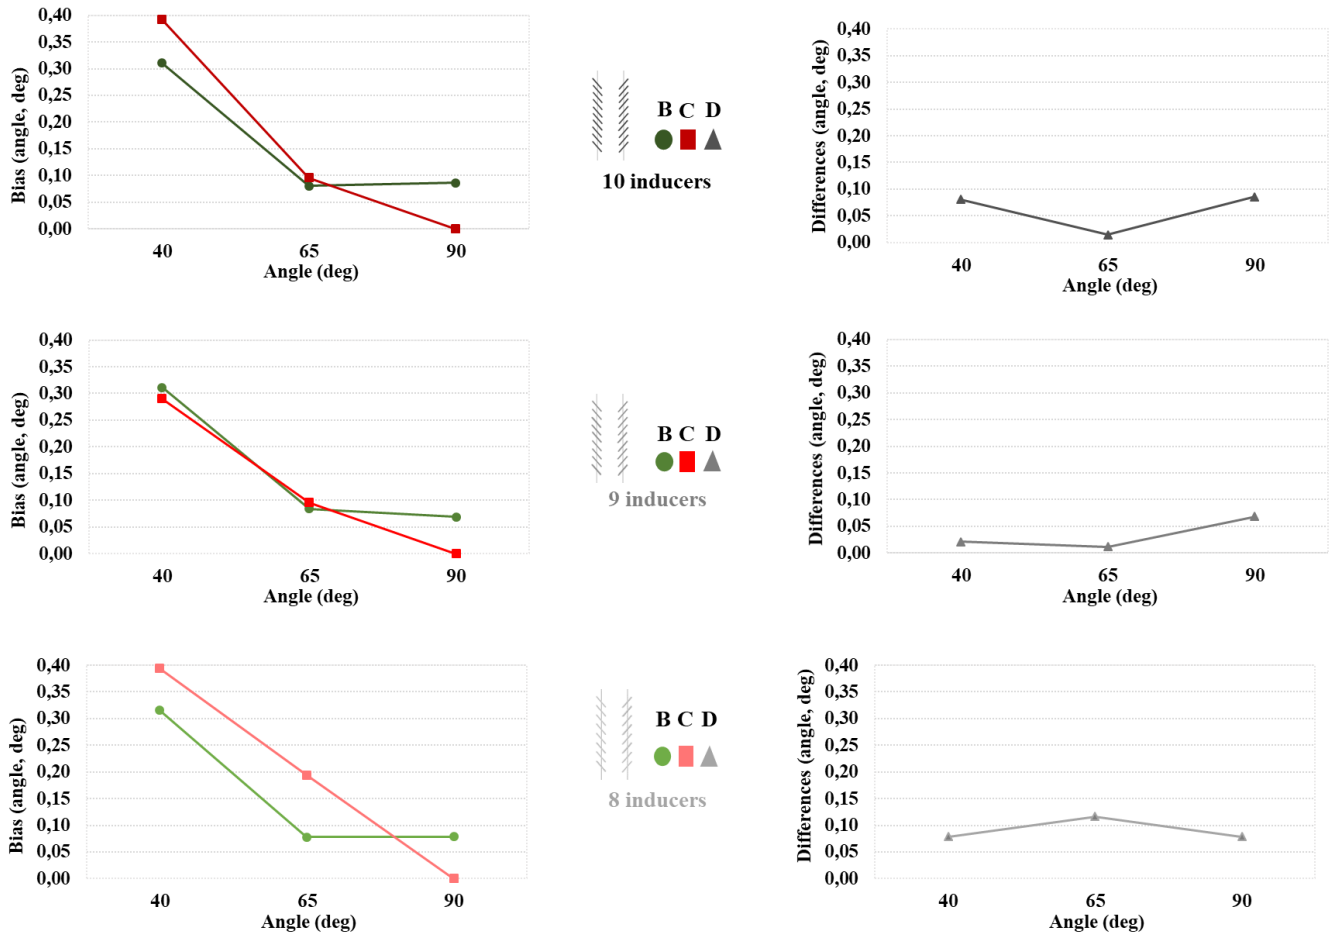

Figure 9. Comparison computational and behavioral results for the Zöllner illusion. **Left:** Comparison of the behavioral and computational biases. Computational – Absolute values for the predicted bias for the three different number of inducers are shown as a function of the three levels of angles. Behavioral – Mean biases (in absolute value) for the three different number of inducers are shown as a function of the three levels of angles. **Right:** Differences between the behavioral and computational biases' values. Values for the differences between the observed bias and the predicted bias for the different number of inducers are shown as a function of the three different angles for the inducers.

553

554

555

556

Retsa et al.

### Poggendorff Illusion - Comparison

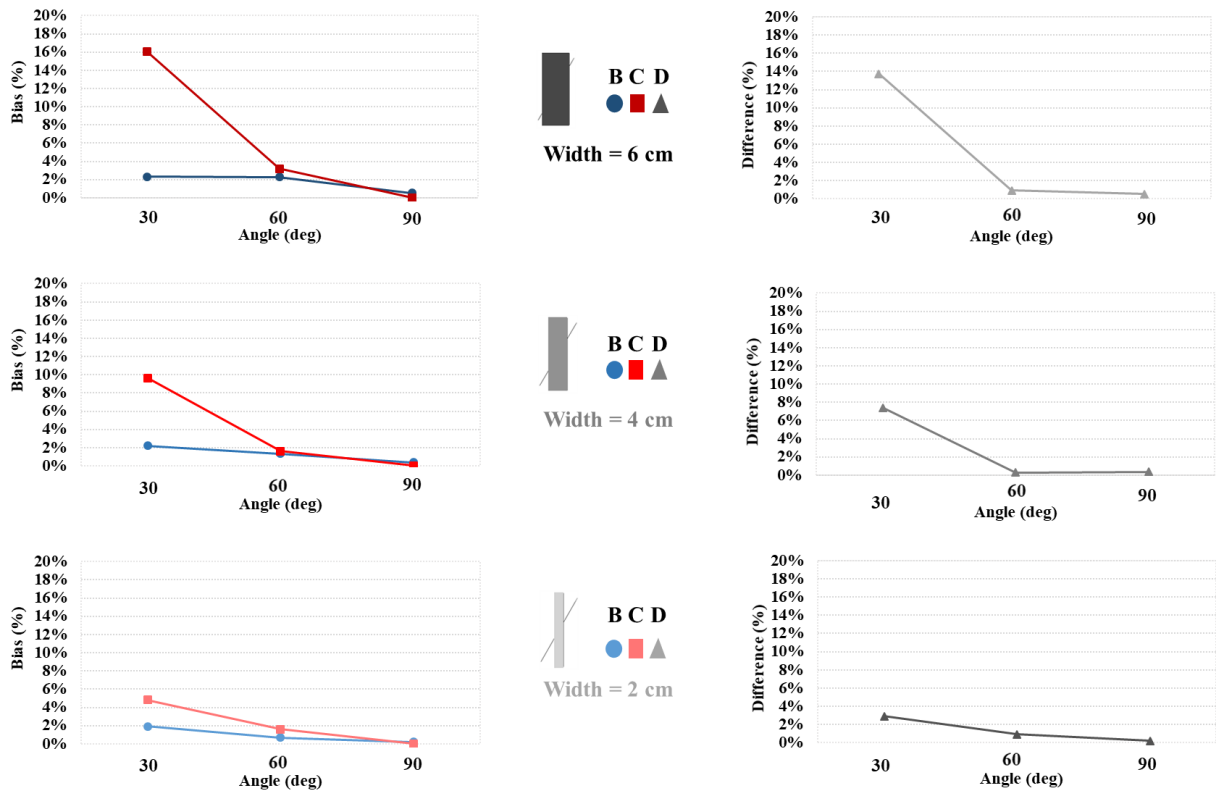

*Figure 10. Comparison computational and behavioral results for the Poggendorff illusion. Left:* Computational – Absolute values for the predictor bias for the three different widths of the central surface are shown as a function of the three levels of angles. Behavioral – Mean sizes of illusion (in absolute value) for the three different widths of the central surface are shown as a function of the three levels of angles. *Right:* Differences between the behavioral and computational biases' values. Values for the differences between the observed bias and the predicted bias for the different widths of the central surface are shown as a function of the three different angles for the crossing line.

557

558

Retsa et al.

559  
560  
561  
562  
563  
564  
565  
566  
567  
568

| Radial Lines | Vertical Lines Distance | Behavioral bias (percentage) | Computed bias (percentage) | Difference (percentage) |
|--------------|-------------------------|------------------------------|----------------------------|-------------------------|
| 15 lines     | 2.4 cm                  | 1.82                         | 1.24                       | 0.58                    |
|              | 3.2 cm                  | 1.83                         | 1.29                       | 0.54                    |
|              | 4 cm                    | 1.67                         | 1.55                       | 0.11                    |
| 11 lines     | 2.4 cm                  | 1.57                         | 1.46                       | 0.11                    |
|              | 3.2 cm                  | 1.59                         | 1.43                       | 0.16                    |
|              | 4 cm                    | 1.61                         | 1.64                       | 0.03                    |
| 7 lines      | 2.4 cm                  | 1.15                         | 1.59                       | 0.44                    |
|              | 3.2 cm                  | 1.28                         | 1.39                       | 0.11                    |
|              | 4 cm                    | 1.28                         | 1.64                       | 0.36                    |

*Table 5. Behavioral and computational results for Hering illusion.* The difference between the results of both approaches is shown in the last column. The biases are shown per stimulus.

569  
570  
571  
572  
573  
574  
575  
576  
577

| Number Inducers | Inducers' Angle | Behavioral bias (deg) | Computed bias (deg) | Difference (deg - abs) |
|-----------------|-----------------|-----------------------|---------------------|------------------------|
| 10 inducers     | 40°             | 0.3108                | 0.3918              | 0.081                  |
|                 | 65°             | 0.0806                | 0.0953              | 0.0147                 |
|                 | 90°             | 0.0858                | 0.0000              | 0.0858                 |
| 9 inducers      | 40°             | 0.3110                | 0.2899              | 0.0211                 |
|                 | 65°             | 0.0838                | 0.0957              | 0.0120                 |
|                 | 90°             | 0.0686                | 0.0000              | 0.0686                 |
| 8 inducers      | 40°             | 0.3156                | 0.3940              | 0.0784                 |
|                 | 65°             | 0.0779                | 0.1942              | 0.1163                 |
|                 | 90°             | 0.0785                | 0.0000              | 0.0785                 |

*Table 6. Behavioral and computational results for Zöllner illusion (in absolute values).* The difference between the results of both approaches is shown in the last column. The biases are shown per stimulus.

578  
579

Retsa et al.

580

581

582

583

584

585

586

587

588

589

590

| Central Width | Crossing Line Angle | Behavioral bias (percentage) | Computed bias (percentage) | Difference (percentage) |
|---------------|---------------------|------------------------------|----------------------------|-------------------------|
| 6 cm          | 30°                 | 2.32%                        | 16%                        | 13.78%                  |
|               | 60°                 | 2.27%                        | 3.21%                      | 0.94%                   |
|               | 90°                 | 0.54%                        | 0%                         | 0.54%                   |
| 4 cm          | 30°                 | 2.21%                        | 9.63%                      | 7.42%                   |
|               | 60°                 | 1.33%                        | 1.60%                      | 0.27%                   |
|               | 90°                 | 0.37%                        | 0%                         | 0.37%                   |
| 2 cm          | 30°                 | 1.92%                        | 4.81%                      | 2.90%                   |
|               | 60°                 | 0.68%                        | 1.60%                      | 0.92%                   |
|               | 90°                 | 0.20%                        | 0%                         | 0.20%                   |

*Table 7. Behavioral and computational results for Poggendorff illusion (in absolute values).* The difference between the results of both approaches is shown in the last column. The biases are shown per stimulus.

591

592

593

594

Retsa et al.

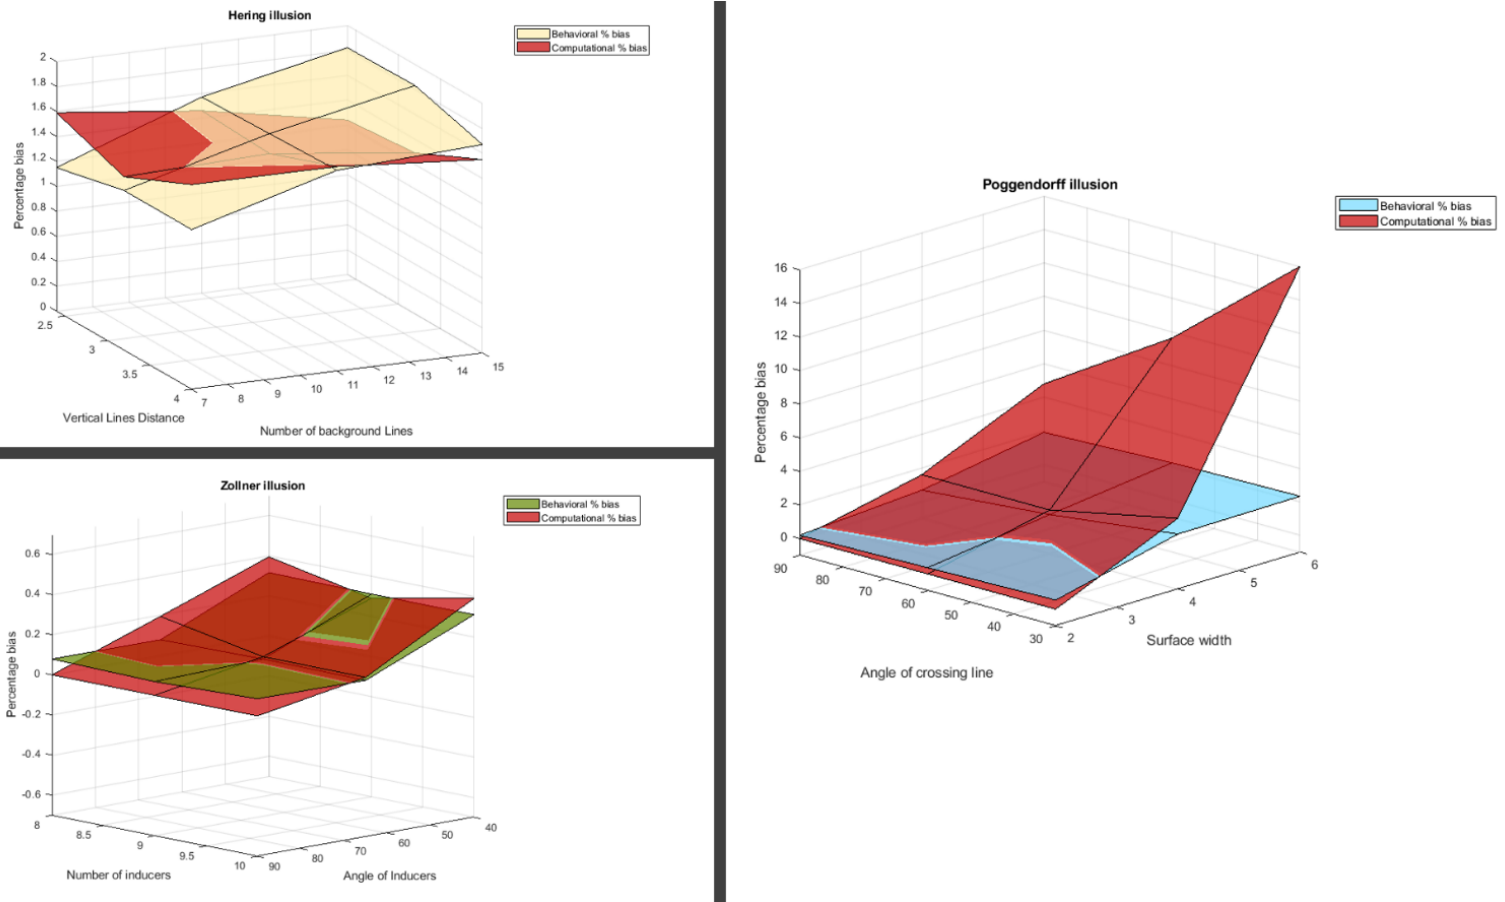

595

596 *Figure 11. 3D visualization of the differences between behavioral and computational bias for each of the three illusions.*

597

## 598 Discussion and conclusions

599 Three different GOIs have been studied in the present work: the Hering, the Zöllner and the  
600 Poggendorff illusions from psychophysical and computational standpoints. The recorded behavioral biases  
601 for the three illusions served as a basis for tuning the parameters of the computational model in order to  
602 obtain computational curves replicating numerically the behavioral biases. Our results provide a roadmap  
603 whereby computational modelling, informed by human psychophysics, can reveal likely mechanistic  
604 underpinnings of perception.

605 To the best of our knowledge, this was the first time these three illusions were behaviorally studied  
606 together and that a standardized definition of bias was quantified, with up-to-date experimental methods.  
607 The determinants of the biases in these three GOIs share an angular component given by the intersection of  
608 the foreground line (or surface) with radial lines, segments (inducers) or one crossing line (Hering: number  
609 of radial lines and distance between the vertical lines; Zöllner: the number and angle of inducers;

Retsa et al.

610 Poggendorff: width of the central surface and the angle of the crossing line). This angular component seems  
611 to reflect the intracortical connectivity of hypercolumns: neurons belonging to the same hypercolumn - and  
612 spiking simultaneously - might be a first determinant of misperception (bias). Second, the distance between  
613 lines (or the width of the surface) is depicted by the global integration of local selected features, therefore  
614 being more representative of the way through which long-range connectivity represents visual stimuli.

615         With this in mind, our results indicate that for the Hering illusion, the number of radial lines does  
616 influence the perception; more radial lines resulted in larger bias, in agreement with Holt-Hasen, 1961  
617 (Holt-Hansen, 1961). A similar effect was observed for the Zöllner illusion: the inducers' angle had an  
618 effect on the perceived bias, which increases as the intersect angle decreases, in agreement with  
619 observations in Oyama, 1973 (Oyama, 1975). On the other hand, no significant main effect of distance  
620 between the two vertical lines was reported in the Hering, only an interaction between the two variables  
621 indicating that the distance was affecting participants' performance in the minimum and maximum radial  
622 lines conditions but not the medium one. If we consider the perceptually more complex phenomenon of the  
623 Poggendorff illusion, its determinants, i.e. the angle of the crossing line and the width of the central surface,  
624 both had an influence on the perception of the illusion, in accordance with previous studies (Jones-Buxton  
625 & Wall, 2001; Weintraub & Krantz, 1971). In fact, the participants' bias increased as the rectangle's width  
626 increased, while the smaller the angle, the larger the bias. This seems to suggest that the presence of a  
627 rectangle surface constitutes a much stronger determinant for the formation of long-range connections than  
628 two straight lines (Hering illusion). Also, an interaction between the two factors (width and angle) at a  
629 behavioral level was observed. It is also worthwhile to observe that in the behavioral results of the three  
630 illusions, the observed bias is always significantly different from zero. This would indicate that participants  
631 do not have a sharp "non-illusory" effect while tested. Instead, while observers do indeed have the  
632 perceptual experience of what is not an illusion, there is nonetheless a slight bias reported. We did not find  
633 a relationship between the sizes of the biases across the three different illusions: this suggests that the  
634 described mechanisms (intracortical and long-range connectivity) contribute to a different extent to these  
635 illusions.

636         The behavioral results served as a basis for tuning the computational models, i.e. iteratively  
637 exploring the set of parameters representing the intra-cortical ( $\sigma$ ;  $\gamma$ ;  $\bar{b}$  – Gabor filters parameters) and  
638 long-range connectivity ( $c$ ;  $\xi$ ) within the model to produce a computational bias matching the recorded  
639 behavior. Computational models have the unique value of enabling the *in-silico* exploration of the  
640 boundaries of the neurophysiological mechanisms modelled without the need of running an *in vivo*  
641 experiment to do so. Within the same illusions, all predicted (computational) biases have been computed  
642 by fixing the size of receptive profiles and the constant  $c$ , related to  $\alpha^{-1}$  of Formula 8. The size of receptive

Retsa et al.

643 fields both mediates for local interaction between simple cells belonging to the same hypercolumn, together  
644 with playing the role of a subsequent level of visual cortices (V2), known to have larger receptive fields. A  
645 fine tuning of the parameters detailed above helped to compromise between the contribution of intra-  
646 cortical connectivity and long-range connectivity: the need for large-size ( $\sigma$ ) receptive fields has been  
647 identified by means of the model, pointing out the likely contribution of higher-level visual processes such  
648 as those in V2 and perhaps elsewhere (Murray & Herrmann, 2013b). The strength of neuro-geometrical  
649 models give a clear and elegant framework to explain the cellular organization and construction of visual  
650 percepts, which can be easily applied to other illusions, such as the Kanizsa triangle (Citti & Sarti, 2006)  
651 or basic perceptual phenomena (line completion) (Favali, Citti, & Sarti, 2017).

652         The computational models replicated well the Zollner behavioral results as well as specific  
653 conditions of both the Poggendorff and Hering illusions. Undoubtedly, the current neuro-geometrical  
654 models despite the fact that they approximate the neurophysiological time features of long-range  
655 connectivity, i.e. the speed at which such connections take place in the hypercolumnar structure of V1 and  
656 V2, they cannot accomplish a perfect correspondence with neurophysiology. However, despite its  
657 limitations, the computational model provides insight into the relevant neurological processes likely  
658 underlying these illusions. Its effectiveness in predicting “spatial-related” phenomena such as the Zollner  
659 illusion, where any effect of distance between the vertical lines seems to play a central role, indicates that  
660 the main neural mechanism involved in this illusion is the intra-cortical connectivity of V1, which is thought  
661 to transpire on a relatively fast timescale. On the other hand, it is also worthwhile to consider those  
662 conditions that were poorly fitted in the Poggendorff illusion. Here, the effect of the width of the rectangle  
663 seemed to produce a larger bias compared to the one obtained from the behavioral results. This suggests  
664 that further investigating the temporal component of perception of these stimuli, (i.e. feedback mechanisms  
665 from higher-level visual cortices into primary visual cortex), might improve our understanding of how  
666 visual neuronal processes create such images. Our computational and behavioral results could therefore be  
667 complemented by brain mapping and neuroimaging studies with high temporal resolution, such as EEG  
668 (Biasiucci, Franceschiello, & Murray, 2019).

669         A limitation of the computational modelling implemented here is that it was not possible to generate  
670 variability in performance that is similar to the inter-individual variability observed in human participants.  
671 This could be artificially generated via Monte-Carlo simulations able to automatically generate a variance  
672 around the Gabor filters’ parameters or the long-range connectivity parameters. However, this would  
673 presuppose that the parameters affecting Gabor filters or long-range connectivity are the only factors  
674 causing the illusory effects.



Retsa et al.

675 To conclude, the present study combining a carefully designed behavioral and computational  
676 paradigms highlights the likely neurophysiological mechanisms e.g. intra-cortical connectivity and long-  
677 range connectivity in V1/V2 implicated in the Hering, Zollner and the Poggendorff illusions and provides  
678 a roadmap for future studies using psychophysical data to tune computational models.

679

680

## 681 **Acknowledgments**

682 Financial support for this work has been provided by the Fondation Asile des Aveugles (grant #232933 to  
683 M.M.M.), a grantor advised by Carigest SA (#232920 to M.M.M.), as well as the Swiss National Science  
684 Foundation (grants #169206 to M.M.M.). We thank Dr. Jonas Richiardi for helpful comments on an  
685 earlier version of this manuscript.

686

## 687 **Authors contributions**

688 C.R., M.M.M. and B.F. conceptualized the problem. N.N. contributed to the development of the behavioral  
689 experiment including implementation of software for rendering the illusions and collecting behavioral data.  
690 C.R. and B.F. tested the protocol and collected the data. L.R. provided the mathematical formulation for  
691 the bias in the Hering illusion, as described in the appendix, and the formal analysis of the phenomena. C.R.  
692 performed the behavioral analysis. A.H.A. performed the computational analysis, elaborated the graphs and  
693 performed the behavioral versus computational comparison, under C.R. and B.F.'s supervisions. C.R.  
694 M.M.M. and B.F. drafted the manuscript, and all authors contributed to internal review.

695

## 696 **Competing interests**

697 None of the authors has competing interests with the present study.

698

## 699 **Materials and correspondence**

700 Correspondence and requests for materials should be addressed to B.F. ([benedetta.franceschiello@fa2.ch](mailto:benedetta.franceschiello@fa2.ch))  
701 or C.R. ([chrysa.retsa@chuv.ch](mailto:chrysa.retsa@chuv.ch)).

702

## 703 **Bibliography**

704 Beckett, P. A. (1989). Illusion decrement and transfer of illusion decrement in real- and subjective-  
705 contour Poggendorff figures. *Perception & Psychophysics*, 45(6), 550–556.

Retsa et al.

- 706 <https://doi.org/10.3758/BF03208062>
- 707 Bednar, J. A. (2014). Hebbian Learning of the Statistical and Geometrical Structure of Visual Input (pp.  
708 335–366). [https://doi.org/10.1007/978-3-642-34444-2\\_8](https://doi.org/10.1007/978-3-642-34444-2_8)
- 709 Ben-Shahar, O., & Zucker, S. (2004). Geometrical Computations Explain Projection Patterns of Long-  
710 Range Horizontal Connections in Visual Cortex. *Neural Computation*, 16(3), 445–476.  
711 <https://doi.org/10.1162/089976604772744866>
- 712 Bertalmío, M., Calatroni, L., Franceschi, V., Franceschiello, B., Gomez Villa, A., & Prandi, D. (2020).  
713 Visual illusions via neural dynamics: Wilson–Cowan-type models and the efficient representation  
714 principle. *Journal of Neurophysiology*, 123(5), 1606–1618. <https://doi.org/10.1152/jn.00488.2019>
- 715 Bertalmio, M., Calatroni, L., Franceschi, V., Franceschiello, B., & Prandi, D. (2020). A Cortical-Inspired  
716 Model for Orientation-Dependent Contrast Perception : A Link with Wilson-Cowan Equations, 472–  
717 484. <https://doi.org/10.1007/978-3-030-22368-7>
- 718 Bertalmío, M., & Cowan, J. D. (2009). Implementing the Retinex algorithm with Wilson–Cowan  
719 equations. *Journal of Physiology-Paris*, 103(1–2), 69–72.  
720 <https://doi.org/10.1016/j.jphysparis.2009.05.001>
- 721 Biasiucci, A., Franceschiello, B., & Murray, M. M. (2019). Electroencephalography. *Current Biology*.  
722 <https://doi.org/10.1016/j.cub.2018.11.052>
- 723 Bosking, William H., et al. (1997). Orientation selectivity and the arrangement of horizontal connections  
724 in tree shrew striate cortex. *Journal of Neuroscience*, 17.6, 2112-2127.
- 725 Bressloff, P. C., Cowan, J. D., Golubitsky, M., Thomas, P. J., & Wiener, M. C. (2001). Geometric visual  
726 hallucinations, Euclidean symmetry and the functional architecture of striate cortex. *Philosophical  
727 Transactions of the Royal Society of London. Series B: Biological Sciences*, 356(1407), 299–330.  
728 <https://doi.org/10.1098/rstb.2000.0769>
- 729 Citti, G., & Sarti, A. (2006). A Cortical Based Model of Perceptual Completion in the Roto-Translation  
730 Space. *Journal of Mathematical Imaging and Vision*, 24(3), 307–326.  
731 <https://doi.org/10.1007/s10851-005-3630-2>
- 732 Daugman, J. G. (1985). Uncertainty relation for resolution in space, spatial frequency, and orientation  
733 optimized by two-dimensional visual cortical filters. *Journal of the Optical Society of America A*,  
734 2(7), 1160. <https://doi.org/10.1364/JOSAA.2.001160>
- 735 De Angelis, G. C., Ohzawa, I., & Freeman, R. D. (1995). Receptive-field dynamics in the central visual  
736 pathways. *Trends in Neurosciences*, 18(10), 451–458. [https://doi.org/10.1016/0166-2236\(95\)94496-  
R](https://doi.org/10.1016/0166-2236(95)94496-<br/>737 R)
- 738 Duits, R., Felsberg, M., Granlund, G., & Romeny, B. ter H. (2007). Image Analysis and Reconstruction  
739 using a Wavelet Transform Constructed from a Reducible Representation of the Euclidean Motion

Retsa et al.

- 740 Group. *International Journal of Computer Vision*, 72(1), 79–102. <https://doi.org/10.1007/s11263->  
741 006-8894-5
- 742 Dura-Bernal, S., Wennekers, T., & Denham, S. L. (2011). The Role of Feedback in a Hierarchical Model  
743 of Object Perception (pp. 165–179). [https://doi.org/10.1007/978-1-4614-0164-3\\_14](https://doi.org/10.1007/978-1-4614-0164-3_14)
- 744 Eagleman, D. M. (2001). Visual illusions and neurobiology. *Nature Reviews Neuroscience*, 2(12), 920–  
745 926. <https://doi.org/10.1038/35104092>
- 746 Ehm, W., & Wackermann, J. (2012). Modeling geometric–optical illusions: A variational approach.  
747 *Journal of Mathematical Psychology*, 56(6), 404–416. <https://doi.org/10.1016/j.jmp.2012.12.001>
- 748 Ehm, W., & Wackermann, J. (2016). Geometric–optical illusions and Riemannian geometry. *Journal of*  
749 *Mathematical Psychology*, 71, 28–38. <https://doi.org/10.1016/j.jmp.2016.01.005>
- 750 Favali, M., Citti, G., & Sarti, A. (2017). Local and Global Gestalt Laws: A Neurally Based Spectral  
751 Approach. *Neural Computation*, 29(2), 394–422. [https://doi.org/10.1162/NECO\\_a\\_00921](https://doi.org/10.1162/NECO_a_00921)
- 752 Fermüller, C., & Malm, H. (2004). Uncertainty in visual processes predicts geometrical optical illusions.  
753 *Vision Research*, 44(7), 727–749. <https://doi.org/10.1016/j.visres.2003.09.038>
- 754 Franceschiello, B., Mashtakov, A., Citti, G., & Sarti, A. (2019). Geometrical optical illusion via sub-  
755 Riemannian geodesics in the roto-translation group. *Differential Geometry and Its Applications*, 65,  
756 55–77. <https://doi.org/10.1016/j.difgeo.2019.03.007>
- 757 Franceschiello, Benedetta, Sarti, A., & Citti, G. (2017). A Neuromathematical Model for Geometrical  
758 Optical Illusions. *Journal of Mathematical Imaging and Vision*, 60(November 2016), 94–108.  
759 <https://doi.org/10.1007/s10851-017-0740-6>
- 760 Hering, H. E. (1861). Beiträge zur physiologie. *Leipzig, W. Engelmann*, 1–5.
- 761 Hoffman, W. C. (1980). Subjective geometry and geometric psychology. *Mathematical Modelling*, 1(4),  
762 349–367. [https://doi.org/10.1016/0270-0255\(80\)90045-7](https://doi.org/10.1016/0270-0255(80)90045-7)
- 763 Holt-Hansen, K. (1961). Hering’s illusion. *Brit. J. Psychol.*, 52(4), 317–321.
- 764 Hubel, D. H., & Wiesel, T. N. (1962). Receptive fields, binocular interaction and functional architecture  
765 in the cat’s visual cortex. *The Journal of Physiology*, 160(1), 106–154.  
766 <https://doi.org/10.1113/jphysiol.1962.sp006837>
- 767 Jones-Buxton, R. A., & Wall, H. M. (2001). The Poggendorff illusion: Effect of distance between the  
768 parallel lines. *Perceptual and Motor Skills*, 92(3 PART 1), 706–710.  
769 <https://doi.org/10.2466/pms.92.3.706-710>
- 770 Jones, J. P., & Palmer, L. A. (1987). An evaluation of the two-dimensional Gabor filter model of simple  
771 receptive fields in cat striate cortex. *Journal of Neurophysiology*, 58(6), 1233–1258.  
772 <https://doi.org/10.1152/jn.1987.58.6.1233>
- 773 Koenderink, J. J., & van Doorn, A. J. (1990). Receptive field families. *Biological Cybernetics*, 63(4),

Retsa et al.

- 774 291–297. <https://doi.org/10.1007/BF00203452>
- 775 Leshner, G. W. (1995). Illusory contours: Toward a neurally based perceptual theory. *Psychonomic*
- 776 *Bulletin & Review*, 2(3), 279–321. <https://doi.org/10.3758/BF03210970>
- 777 Lotze, R. H. (1852). R. H. Medicinische Psychologie, *Göttingen*.
- 778 Mirebeau, J.-M. (2018). Fast-Marching Methods for Curvature Penalized Shortest Paths. *Journal of*
- 779 *Mathematical Imaging and Vision*, 60(6), 784–815. <https://doi.org/10.1007/s10851-017-0778-5>
- 780 Montgomery, R. (2006). *A Tour of Subriemannian Geometries, Their Geodesics and Applications* (Vol.
- 781 91). Providence, Rhode Island: American Mathematical Society. <https://doi.org/10.1090/surv/091>
- 782 Murray, M. M., & Herrmann, C. S. (2013a). Illusory contours: a window onto the neurophysiology of
- 783 constructing perception. *Trends in Cognitive Sciences*, 17(9), 471–481.
- 784 <https://doi.org/10.1016/j.tics.2013.07.004>
- 785 Murray, M. M., & Herrmann, C. S. (2013b). Illusory contours: a window onto the neurophysiology of
- 786 constructing perception. *Trends in Cognitive Sciences*, 17(9), 471–481.
- 787 <https://doi.org/10.1016/j.tics.2013.07.004>
- 788 Oppel, J. J. (1855). Ueber geometrisch-optische Täuschungen [On geometrical-optical illusions].
- 789 *Jahresbericht Des Physikalischen Vereins Zu Frankfurt Am Main*, : 37–47.
- 790 Oyama, T. (1975). Determinants of the Zollner illusion. *Psychological Research*, 37(3), 261–280.
- 791 <https://doi.org/10.1007/BF00309038>
- 792 Peirce, J., Gray, J. R., Simpson, S., MacAskill, M., Höchenberger, R., Sogo, H., ... Lindeløv, J. K.
- 793 (2019). PsychoPy2: Experiments in behavior made easy. *Behavior Research Methods*, 51(1), 195–
- 794 203. <https://doi.org/10.3758/s13428-018-01193-y>
- 795 Petitot, J. (2002). Neurogeometry of V1 and Kanizsa Contours. *Axiomathes*, 13(3/4), 347–363.
- 796 <https://doi.org/10.1023/B:AXIO.0000007240.49326.7e>
- 797 Petkov, N., & Subramanian, E. (2007). Motion detection, noise reduction, texture suppression, and
- 798 contour enhancement by spatiotemporal Gabor filters with surround inhibition. *Biological*
- 799 *Cybernetics*, 97(5–6), 423–439. <https://doi.org/10.1007/s00422-007-0182-0>
- 800 Rock, I., & Anson, R. (1979). Illusory Contours as the Solution to a Problem. *Perception*, 8(6), 665–681.
- 801 <https://doi.org/10.1068/p080665>
- 802 Sanguinetti, G., Bekkers, E., Duits, R., Janssen, M. H. J., Mashtakov, A., & Mirebeau, J.-M. (2015). Sub-
- 803 Riemannian Fast Marching in SE(2) (pp. 366–374). [https://doi.org/10.1007/978-3-319-25751-8\\_44](https://doi.org/10.1007/978-3-319-25751-8_44)
- 804 Schuster, H. G., & Wagner, P. (1990). A model for neuronal oscillations in the visual cortex. *Biological*
- 805 *Cybernetics*, 64(1), 77–82. <https://doi.org/10.1007/BF00203633>
- 806 Simoncelli, E. P., & Olshausen, B. A. (2001). Natural Image Statistics and Neural Representation. *Annual*
- 807 *Review of Neuroscience*, 24(1), 1193–1216. <https://doi.org/10.1146/annurev.neuro.24.1.1193>

Retsa et al.

- 808 Weintraub, D. J., & Krantz, D. H. (1971). The Poggendorff illusion: Amputations, rotations, and other  
809 perturbations. *Perception & Psychophysics*, *10*(4), 257–264. <https://doi.org/10.3758/BF03212818>
- 810 Westheimer, G. (2008). Illusions in the spatial sense of the eye: Geometrical–optical illusions and the  
811 neural representation of space. *Vision Research*, *48*(20), 2128–2142.  
812 <https://doi.org/10.1016/j.visres.2008.05.016>
- 813 Young, R. A. (1987). The Gaussian derivative model for spatial vision: I. Retinal mechanisms. *Spatial*  
814 *Vision*, *2*(4), 273–293. <https://doi.org/10.1163/156856887X00222>
- 815 Zöllner, F. (1860). Photometrische Untersuchungen. *Annalen Der Physik Und Chemie*, *185*(2), 244–275.  
816 <https://doi.org/10.1002/andp.18601850204>

817

## 818 **Appendix**

### 819 **A) Mathematical expression for the curves manipulated manually by the participant.**

820 In the Hering illusion the stimulus consists of a pair of vertical straight lines, on top of a collection of  
821 straight lines passing through a central point. The observer perceives the straight vertical lines as slightly  
822 curved away from the central point in the horizontal direction. Our goal is to identify an equation for the  
823 perceived curve that can be manipulated within an experimental design.

824 This illusion has some clear symmetries, namely flipping across the vertical axis or across the horizontal  
825 axis does not change anything. Therefore we can reduce our consideration to the top right quadrant and  
826 then extend by reflection.

827 In this quadrant we will consider curves leaving a fixed point on the top edge and reaching the bottom edge  
828 at a variable point and being orthogonal to both edges at the intersection point. The first point and the  
829 tangent directions are fixed, but the position of the second point is what makes the curve deviate from the  
830 neutral configuration (i.e. when the curves are vertical straight lines). The subjects can choose the position  
831 of the second endpoint until it matches to what they perceive as straight, given an initial offset (see Methods  
832 section).

833 Since we are imposing three fixed conditions (one control point and two tangent directions), we need a  
834 family of curves with at least four degrees of freedom; three degrees are fixed by these three conditions,  
835 and the subject has one degree of freedom to play with. The easiest such family is given by the algebraic  
836 curves defined by polynomials of degree at most three and real coefficients (this family is a real vector  
837 space of dimension 4; lower degree would not give us enough flexibility; higher degree would result in  
838 extra degrees of freedom).

839 In order to set up our computations, let us choose the vertical axis as the x-axis, oriented upwards, and the  
840 horizontal axis as the y-axis, oriented to the right. For simplicity, we are going to align the x-axis along the  
841 right vertical straight line in the neutral configuration. In this way the curves we care about will intersect

Retsa et al.

842 the y-axis in points of the form  $(0,B)$  for some  $B \in \mathbb{R}$ , with  $B = 0$  corresponding to the neutral  
 843 configuration, and they will intersect the x-axis at the endpoint  $(C,0)$ , where  $C$  is half of the edge length of  
 844 the original picture, equal to 45% of the total screen height where the experiment was performed. While  
 845 the parameter  $C$  is fixed, the value of  $B$  is precisely what the subject manipulates.

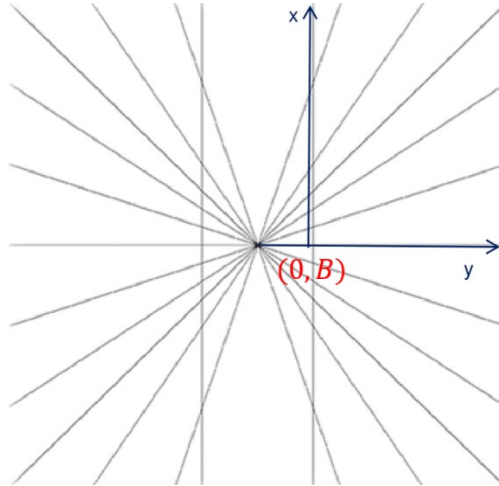

846  
 847 The equation for such a polynomial of degree 3 in these coordinates is given by

848  
 849 
$$y = f_B(x) = \frac{2B}{C^3}x^3 - \frac{3B}{C^2}x^2 + B = \frac{2B}{C^3}\left(x^3 - \frac{3C}{2}x^2 + \frac{C^3}{2}\right)$$

850  
 851 Once again, here  $C$  is a fixed quantity, while  $B$  is allowed to vary, describing the 1-parameter family of  
 852 curves we need. The choice of  $B$  is equivalent to some geometrically meaningful quantities, which can be  
 853 computed from the first and second derivatives.

854  
 855 
$$f'_B(x) = \frac{2B}{C^3}(3x^2 - 3Cx), f''_B(x) = \frac{2B}{C^3}(6x - 3C)$$

856  
 857 For instance, notice that the coordinates of the unique point of flex of the above curves are

858  
 859 
$$\left(\frac{C}{2}, \frac{B}{2}\right)$$

860  
 861 and the tangent line at this point has equation

862  
 863 
$$y = -\frac{3B}{2C}x + \frac{5B}{4}$$

Retsa et al.

864 which means it has slope  $\frac{-3B}{2C}$ . To get another geometric parameter, notice that the curvature at the endpoints  
865 can be computed in terms of the second derivative at those points, which is

866 
$$|f_B''(0)| = |f_B''(C)| = \frac{6B}{C^2}$$

867 It should be remarked that in our setting  $B \ll C$ , so that both the slope and the curvature are essentially  
868 zero, hence not useful from the numerical point of view, even though they are a good theoretical measure  
869 of how far these curves are from the straight lines. To have a numerically useful parameter we stick  
870 therefore to  $B$ , namely the distance in cm (or bias) along the whole paper; we emphasize once again that  
871 the choice of  $B$  is equivalent to these geometric features.

872
